1  
2  
3  
4  
5  
6  
7  
8  
9  
10  
11  
12  
13  
14  
15  
16  
17  
18  
19  
20  
21  
22  
23  
24  
25  
26  
27

Article type: Original Article

**PHOSPHORYLATION-DEPENDENT CONTROL OF ARC PROTEIN BY SYNAPTIC PLASTICITY  
REGULATOR TNIK**

Alicia Walczyk Mooradally<sup>1</sup>, Jennifer Holborn<sup>1</sup>, Karamjeet Singh<sup>1</sup>, Marshall Tyler<sup>2</sup>,  
Debasis Patnaik<sup>2</sup>, Hendrik Wesseling<sup>3</sup>, Nicholas J Brandon<sup>4</sup>, Judith Steen<sup>3</sup>, Steffen P Graether<sup>1</sup>,  
Stephen J Haggarty<sup>2\*</sup>, Jasmin Lalonde<sup>1\*</sup>

<sup>1</sup> Department of Molecular and Cellular Biology, University of Guelph, 50 Stone Road E, Guelph,  
ON N1G 2W1, Canada

<sup>2</sup> Massachusetts General Hospital, Centre for Genomic Medicine, 185 Cambridge Street, Boston,  
MA 02114, USA

<sup>3</sup> Boston Children's Hospital, F.M. Kirby Center for Neurobiology, Harvard Medical School, 3  
Blackfan Circle, Boston, MA 02115, USA

<sup>4</sup> Neuroscience, BioPharmaceuticals R&D, AstraZeneca Boston, Waltham, MA 02451, USA

\* To whom correspondence should be addressed: Dr. Jasmin Lalonde, [jlalon07@uoguelph.ca](mailto:jlalon07@uoguelph.ca); Dr.  
[Stephen J. Haggarty, shaggarty@mg.harvard.edu](mailto:Stephen.J.Haggarty@mg.harvard.edu)

**Running title:** Arc phosphorylation by TNIK

**Keywords:** Arc; TNIK; Phosphorylation; Gag protein; Virus-like capsids; Oligomerization;  
Electron microscopy

28 **Abbreviations**

29 AMPAR,  $\alpha$ -amino-3-hydroxy-5-methyl-4-isoxazolepropionic acid receptor; Arc, activity-  
30 regulated cytoskeleton-associated protein; BSA, bovine serum albumin; CaMKII,  
31 calcium/calmodulin-dependent protein kinase II; DAPI, 4',6-diamidino-2-phenylindole; DISC1,  
32 disrupted in schizophrenia 1; DLS, dynamic light scattering; DMEM, Dulbecco's modified eagle's  
33 medium; DTT, dithiothreitol; ECL, enhanced chemiluminescence; EDTA,  
34 ethylenediaminetetraacetic acid; FPLC, fast protein liquid chromatography; GAPDH,  
35 glyceraldehyde 3-phosphate dehydrogenase; HIV, human immunodeficiency virus; HPLC, high  
36 performance liquid chromatography; HRP, horseradish peroxidase; ICC, immunocytochemistry;  
37 IP, immunoprecipitation; IPTG, isopropyl  $\beta$ -D-1-thiogalactopyranoside; KO, knockout; LB,  
38 Luria-Bertani medium; LC/MS, liquid chromatography-mass spectrometry; LTD, long-term  
39 depression; LTP, long-term potentiation; mGLUR, metabotropic glutamate receptor; NRD,  
40 nuclear retention domain; PCR, polymerase chain reaction; PMSF, phenylmethylsulfonyl fluoride;  
41 PSD-95, postsynaptic density protein 95; PTMs, post-translational modifications; RIPA,  
42 radioimmunoprecipitation assay; SDS-PAGE, sodium dodecyl sulphate-polyacrylamide gel  
43 electrophoresis; TARP $\gamma$ 2, transmembrane AMPAR regulatory protein  $\gamma$ 2; TNIK, the tumor  
44 necrosis factor receptor (Traf2) and noncatalytic region of tyrosine kinase (Nck) interacting kinase;  
45 WB, western blot; WT, wildtype.

46 **Abstract**

47 Activity-regulated cytoskeleton-associated protein (Arc) is an immediate-early gene product that  
48 support neuroplastic changes important for cognitive function and memory formation. As a protein  
49 with homology to the retroviral Gag protein, a particular characteristic of Arc is its capacity to  
50 self-assemble into virus-like capsids that can package mRNAs and transfer those transcripts to  
51 other cells. Although a lot has been uncovered about the contributions of Arc to neuron biology  
52 and behavior, very little is known about how different functions of Arc are coordinately regulated  
53 both temporally and spatially in neurons. The answer to this question we hypothesized must  
54 involve the occurrence of different protein post-translational modifications acting to confer  
55 specificity. In this study, we used mass spectrometry and sequence prediction strategies to map  
56 novel Arc phosphorylation sites. Our approach led us to recognize serine 67 (S67) and threonine  
57 278 (T278) as residues that can be modified by TNIK, which is a kinase abundantly expressed in  
58 neurons that shares many functional overlaps with Arc and has, along with its interacting proteins  
59 such as the NMDA receptor, been implicated as a risk factor for psychiatric disorders.  
60 Furthermore, characterization of each residue using site-directed mutagenesis to create S67 and  
61 T278 mutant variants revealed that TNIK action at those amino acids can strongly influence Arc's  
62 subcellular distribution and self-assembly as capsids. Together, our findings reveal an unsuspected  
63 connection between Arc and TNIK. Better understanding of the interplay between these two  
64 proteins in neuronal cells could lead to new insights about apparition and progression of  
65 psychiatric disorders.

## 66 **Introduction**

67 Neurons face constant pressure to adjust the number and strength of their connections in response  
68 to activity and other stimuli. This remarkable capacity for change involves a range of effectors  
69 whose expression and/or function can be rapidly modified in response to signals. As part of this  
70 select group of molecules, the Activity-regulated cytoskeleton-associated protein (*Arc*, also known  
71 as *Arg3.1*) is increasingly seen as a critical player because of its direct interaction with many other  
72 synaptic proteins, as well as role in multiple aspects of neuroplasticity.

73 Studies that examined the impact of interfering with *Arc* expression revealed the importance  
74 of this immediate-early gene for the activity of various brain systems. For instance, adult *Arc*  
75 knockout (KO) mice present lower long-term memory performance on a number of learning tasks  
76 without having problems with short-term memory (Plath *et al.* 2006), and other work also made  
77 clear that reduced *Arc* levels limit the manifestation of different types of experience-dependent  
78 neuronal change, including ocular dominance plasticity shift caused by monocular deprivation  
79 during the critical period (McCurry *et al.* 2010), the development and maintenance of binocular  
80 neurons in the visual cortex (Jenks and Shepherd 2020), and the apparition of refined spatial  
81 learning abilities at adulthood (Gao *et al.* 2018). For the most part, these different phenotypes  
82 closely align with the fact that *Arc* KO mice have deficits in long-term potentiation (LTP) (Plath  
83 *et al.* 2006; Messaoudi *et al.* 2007), long-term depression (LTD) (Waung *et al.* 2008; Jakkamsetti  
84 *et al.* 2013), and homeostatic scaling (Shepherd *et al.* 2006); as well as *Arc*'s known contribution  
85 to the organization and plasticity of post-synaptic terminals, which includes interaction with  
86 members of the endocytic vesicular machinery to control surface levels of 3-hydroxy-5-methyl-4-  
87 isoxazole receptors (AMPArs) (Chowdhury *et al.* 2006; Rial Verde *et al.* 2006; Dasilva *et al.*  
88 2016), participation in actin-dependent remodeling of dendritic spines (Messaoudi *et al.* 2007,  
89 Peebles *et al.* 2010), synapse elimination in the developing cerebellum (Mikuni *et al.* 2013), and  
90 influence over the expression of AMPAR subunit *GluA1* mRNA through interaction with  
91 transcriptional regulators in the nuclear compartment (Korb *et al.* 2013). Together, these different  
92 behavioral, cellular, and molecular findings clearly illustrate the importance of *Arc* to brain  
93 function.

94 Despite more than two decades of steady discoveries about *Arc* expression and function, the  
95 understanding of its physicochemical and structural properties has progressed more slowly in  
96 comparison. However, a series of recent studies helped to fill major gaps concerning this topic.

97 First, biochemical and biophysical analyses conducted with human recombinant Arc described  
98 how its modular structure, which consists of the N- and C-terminal domains divided by a flexible  
99 central hinge region, allows monomeric units to self-arrange as large soluble oligomers (Myrum  
100 *et al.* 2015). Coincidentally, Zhang and colleagues (2015) reported on their side that Arc's C-  
101 terminal region contains two distinct subdomains, termed N-lobe and C-lobe, that share a high  
102 degree of similarity to the capsid domain of several retroviral Gag proteins, including the one seen  
103 with the human immunodeficiency virus (HIV). In addition to this observation, comparison of Arc  
104 homologs revealed conservation of the Gag domain across vertebrates—a result that supports, by  
105 the way, a prediction made a few years before about the possible retrotransposon evolutionary  
106 origin of the *Arc* gene (Campillos *et al.* 2006)—and crystal studies showed how the N-lobe region  
107 mediates intermolecular binding of Arc to the synaptic proteins Ca<sup>2+</sup>/calmodulin-dependent  
108 protein kinase II (CaMKII), transmembrane AMPAR regulatory protein  $\gamma$ 2 (TARPy2, also known  
109 as Stargazin) (Zhang *et al.* 2015), and guanylate kinase-associated protein (GKAP) (Zhang *et al.*,  
110 2015; Hallin *et al.* 2021). Further investigation within this interactive binding domain measured  
111 varying levels of binding affinities to different short peptide motifs, suggesting another layer of  
112 complexity and control in the role played by Arc as a hub protein facilitating structural  
113 rearrangement of the postsynaptic density (Hallin *et al.* 2020). Finally, these studies led the way  
114 to one of the most surprising discoveries about Arc protein which is its capacity to self-organize  
115 as virus-like capsids that can transfer genomic material, including its own mRNA transcripts, from  
116 a donor neuron to other cells (Ashley *et al.* 2018; Pastuzyn *et al.* 2018; Erlendsson *et al.* 2020).  
117 Although this specific phenomenon will require further research to understand its full significance  
118 in neuron biology, the current evidence clearly indicate that Arc should be also considered as an  
119 active participant in intercellular communication events of the nervous system.

120 With a role in many processes that are each mechanistically different and occurring in distinct  
121 subcellular compartments, it is not clear how Arc can be rapidly recruited to perform one specific  
122 task over another. Surely, a complete answer to this question will implicate multiple factors that  
123 guide Arc to a precise location and command its association with specialized effectors. Consistent  
124 with this point, several studies have already identified a small number of post-translational  
125 modifications (PTMs) with specific consequence on Arc. One example of this is how  
126 ubiquitination of specific lysine residues can trigger Arc proteasomal degradation (Greer *et al.*  
127 2010; Mabb *et al.* 2014). Here, though, the influence of the ubiquitin-proteasomal system is likely

128 more complex than initially thought as other work also revealed that the acetylation of lysine sites  
129 can inversely increase Arc protein half-life and abundance, hinting therefore at a competition  
130 between these two types of PTMs (Lalonde *et al.* 2017). In addition to these results, one study also  
131 found that SUMOylation of Arc can stimulate its association with the actin regulator drebrin A in  
132 dendritic spines to promote LTP consolidation (Nair *et al.* 2017), and another showed that  
133 preventing palmitoylation of a cluster of cysteines in Arc's N-terminus can impact synaptic  
134 depression (Barylko *et al.* 2018). Finally, several phosphorylation events have been implicated in  
135 the control of Arc as well. These include S206 in the central hinge region targeted by Extracellular  
136 signal-regulated kinase 2 (ERK2) to seemingly control nuclear:cytoplasmic localization  
137 (Nikolaienko *et al.* 2017), multiple putative Glycogen synthase kinase-3 (GSK3 $\alpha/\beta$ ) sites gating  
138 degradation and effect on dendritic spines morphology (Gozdz *et al.* 2017), as well as S260 for  
139 which phosphorylation by CaMKII can prevent high-order oligomerization via interference in N-  
140 lobe and C-lobe subdomains interaction (Zhang *et al.* 2019).

141 These examples most certainly represent only a subset of Arc's PTMs with many other events  
142 remaining to be found and associated with specific function. This motivated us to search for novel  
143 phosphorylation sites by combining mass spectrometry and sequence prediction strategies. This  
144 approach allowed us to identify two candidate residues, one in the N-terminal end and another at  
145 the C-terminus, that could be modified by the tumor necrosis factor receptor (Traf2) and  
146 noncatalytic region of tyrosine kinase (Nck) interacting kinase (TNIK), a member of the germinal  
147 center kinases family that is abundantly expressed in neurons and shares many functional overlaps  
148 with Arc. Using proteomics, *in vitro* assays, and overexpression experiments in mouse Neuro2a  
149 neuroblastoma cells, we collected evidence suggesting that phosphorylation of each candidate sites  
150 exert very different effects on the distribution and oligomerization of Arc. The connection between  
151 Arc and TNIK that we found provide a new direction to understand how Arc can adopt a specific  
152 role in different cellular subcompartments.

153

## 154 **Materials and Methods**

### 155 *Cell culture and transfection*

156 Neuro2a cells (mouse neuroblastoma cell line also known as N2a cells, RRID: CVCL\_0470) were  
157 cultured in DMEM supplemented with 10% HyClone FetalClone II serum (Cytiva, Marlborough,  
158 MA, USA), penicillin (50 units/ml), and streptomycin (50  $\mu$ g/ml). Cells were transfected overnight

159 using Lipofectamine 2000 (Invitrogen, Grand Island, NY, USA) according to the manufacturer's  
160 protocol. The Neuro2A cell line was used in previous publication by our group (Lalonde *et al.*  
161 2017). During the experiment schedule, the cell line was subjected to 4-5 more passages.

162

### 163 *Antibodies and pharmacological compounds*

164 The antibodies recognizing TNIK (1:1000 for western blotting [WB], #612210, RRID:  
165 AB\_399573) and phosphoserine/threonine residues (1:1000 for WB, #612548, RRID:  
166 AB\_399843) were purchased from BD Biosciences (San Jose, CA, USA). The Arc antibody  
167 (1:1000 for immunocytochemistry [ICC] and 1:2000 for WB, #156 003, RRID: AB\_887694) was  
168 from Synaptic Systems (Goettingen, Germany) while the horseradish peroxidase (HRP)-  
169 conjugated FLAG (1:1000 for WB, A8592, RRID: AB\_439702), FLAG M2 (1:1000 for WB,  
170 F1804, RRID: AB\_262044),  $\beta$ -actin (1:100,000 for WB, A1978, RRID: AB\_476692), and  
171 GAPDH (1:100,000 for WB, AB2302, RRID: AB\_10615768) antibodies were from Sigma-  
172 Aldrich (St. Louis, MO, USA). The antibodies detecting GST (1:1000 for WB, #2625, RRID:  
173 AB\_490796) and Myc-tag (1:1000 for WB, #2276, RRID: AB\_331783) were acquired from Cell  
174 Signaling Technology (Beverly, MA, USA) whereas the drebrin antibody (1:500 for WB, sc-  
175 374269, RRID: AB\_10990108) was from Santa Cruz Biotechnology (Santa Cruz, CA, USA).  
176 Finally, cross-absorbed HRP-conjugated secondary antibodies were from Thermo Fisher Scientific  
177 (Waltham, MA, USA).

178 AK-7 was purchased from Tocris Bioscience (Bristol, UK), oxamflatin from Santa Cruz  
179 Biotechnology, and KY-05009 from Sigma-Aldrich. The inactive analog G883-2176 was obtained  
180 from commercial sources (Molport, Beacon, NY, USA).

181

### 182 *Plasmids*

183 The pCMV6-Arc-Myc-DDK (FLAG) mouse ORF cDNA clone (MR206218) was from OriGene  
184 Biotechnologies (Rockville, MD, USA). The pRK5 vector was a generous gift from Stephen Moss  
185 (Tufts University, Boston, MA, USA). Arc-Myc-FLAG and Arc-GST point mutants (S67A, S67D,  
186 T278A, T278D) were generated using the Q5 Site-Directed Mutagenesis Kit from New England  
187 Biolabs (Ipswich, MA, USA) according to manufacturer's instructions. All constructs were  
188 verified by DNA sequencing.

189

190 *Western blotting*

191 For western blotting, cells were collected by scraping in ice-cold radioimmunoprecipitation assay  
192 (RIPA) buffer (50 mM Tris-HCl [pH 8.0], 300 mM NaCl, 0.5% Igepal-630, 0.5% deoxycholic  
193 acid, 0.1% SDS, 1 mM EDTA) supplemented with a cocktail of protease inhibitors (Complete  
194 Protease Inhibitor without EDTA, Roche Applied Science, Indianapolis, IN, USA) and  
195 phosphatase inhibitors (Phosphatase Inhibitor Cocktail 3, Sigma-Aldrich). One volume of 2X  
196 Laemmli buffer (100 mM Tris-HCl [pH 6.8], 4% SDS, 0.15% bromophenol blue, 20% glycerol,  
197 200 mM  $\beta$ -mercaptoethanol) was added and the extracts were boiled for 5 min. Samples were  
198 adjusted to an equal concentration after protein concentrations were determined using the BCA  
199 assay (Pierce, Thermo Fisher Scientific). Lysates were separated using sodium dodecyl sulphate-  
200 polyacrylamide gel electrophoresis (SDS-PAGE) and then transferred to a nitrocellulose  
201 membrane. Next, the membrane was blocked in TBST (Tris-buffered saline and 0.1% Tween 20)  
202 supplemented with 5% non-fat powdered milk and probed overnight at 4°C with the indicated  
203 primary antibody. Finally, after washing with TBST the membrane was incubated with the  
204 appropriate secondary antibody and visualized using enhanced chemiluminescence (ECL)  
205 reagents according to the manufacturer's guidelines (Pierce, Thermo Fisher Scientific).

206 The following procedure was used to quantify western blot analyses. First, equal quantity of  
207 protein lysate was analyzed by SDS-PAGE for each biological replicate. Second, the exposure  
208 time of the film to the ECL chemiluminescence was the same for each biological replicate. Third,  
209 all the exposed films were scanned on a HP Laser Jet Pro M377dw scanner in grayscale at a  
210 resolution of 300 dpi. Fourth, the look-up table (LUT) of the scanned tiff images was inverted and  
211 the intensity of each band was individually estimated using the selection tool and the histogram  
212 function in Adobe Photoshop CC 2020 software. Finally, the intensity of each band was divided  
213 by the intensity of its respective loading control ( $\beta$ -actin) to provide the normalized value used for  
214 statistical analysis.

215

216 *Co-immunoprecipitation*

217 To assess interaction between Arc and TNIK under different experimental conditions, each co-  
218 immunoprecipitation (IP) was completed with one 90% confluent 10 cm plate of Neuro2a cells  
219 overexpressing wild-type (WT) Arc-Myc-FLAG. Cells from each plate were collected and lysed  
220 in 500  $\mu$ L ice-cold soft lysis buffer (20 mM Tris-HCl [pH 8.0], 150 mM NaCl, 0.2% Igepal-630,



221 2 mM EDTA) supplemented with a cocktail of protease inhibitors (Complete Protease Inhibitor  
222 without EDTA, Roche Applied Science, Indianapolis, IN) and phosphatase inhibitors  
223 (Phosphatase Inhibitor Cocktail 3, Sigma-Aldrich) followed by homogenization using  
224 QIAshredder spin columns (Qiagen, Hilden, Germany). Next, lysates were adjusted to a similar  
225 protein concentration after quantification with BCA assay and a fraction of each sample reserved  
226 as input material. Equal amount of the remaining lysate from each condition was used for the IP  
227 procedure. FLAG-tagged Arc was immunopurified using 50  $\mu$ L of anti-FLAG M2 Magnetic Beads  
228 (Sigma-Aldrich, M8823) while endogenous TNIK was pulled-down with 10  $\mu$ L of anti-TNIK  
229 antibody (BD Biosciences, #612250) and 25  $\mu$ L Dynabeads Protein G (Invitrogen, Thermo Fisher  
230 Scientific, #10003D). After overnight incubation at 4°C, beads were washed with 1000  $\mu$ L of soft  
231 lysis buffer thrice for 10 minutes at 4°C. For FLAG-Arc IP, the beads were resuspended in 50  $\mu$ L  
232 of FLAG peptide solution (1  $\mu$ g/ $\mu$ L in RIPA, Sigma-Aldrich, F3290) after the last wash to elute  
233 FLAG-tagged Arc and other proteins from beads. For TNIK IPs, beads were resuspended in 60  $\mu$ L  
234 of 1X SDS-LB. Finally, samples were run according to western blotting procedure described above  
235 and 1% of protein lysate from each sample was utilized as input control.

236 Co-immunoprecipitations of Arc-Myc-FLAG (WT, S67D, and S67A) with endogenous drebrin  
237 were performed as described above. The different FLAG-tagged Arc proteins overexpressed in  
238 Neuro2a cells were immunopurified using 50  $\mu$ L anti-FLAG M2 Magnetic Beads from lysates and  
239 eluted using FLAG peptide solution.

240

#### 241 *Mass spectrometric analysis*

242 Mass spectrometry procedure for shotgun detection of Arc phosphorylated residues was similar to  
243 analyses probing for Arc acetylation and ubiquitination modifications previously published by our  
244 group (Lalonde *et al.*, 2017). In brief, WT Arc-Myc-FLAG was overexpressed in Neuro2a cells  
245 and immunopurified with anti-FLAG M2 Magnetic Beads (Sigma-Aldrich). After washes with  
246 RIPA, Arc-Myc-FLAG was eluted by incubating beads in 50  $\mu$ L of RIPA buffer containing 25  $\mu$ g  
247 of FLAG peptide (Sigma-Aldrich) for 2 h at 25°C with gentle agitation. Eluates from nine separate  
248 IPs were combined, concentrated by ethanol protein precipitation and separated by SDS-PAGE.  
249 After Coomassie staining, the gel band corresponding to Arc-Myc-FLAG was excised and in-gel  
250 digested using trypsin prior to mass spectrometric analysis. All LC/MS experiments were  
251 performed as detailed in Lalonde *et al.* (2017) with a Q Exactive mass spectrometer (Thermo

252 Scientific) coupled to a micro-autosampler AS2 and a nanoflow HPLC pump (Eksigent  
253 Technologies, Dublin, CA, USA). Data for two biological replicates were processed separately  
254 and pooled.

255

#### 256 *Recombinant protein preparation*

257 DNA encoding WT mouse Arc was amplified from the original pCMV6-Arc-Myc-FLAG plasmid  
258 using PCR, subcloned into a pGEX-4T-3 vector between the Sall and NotI sites and transformed  
259 into the BL21 derivatives *E. coli* cells Rosetta 2 (DE3) Competent Cells (Novagen, Sigma-  
260 Aldrich). Arc S67A and T278A DNA was amplified from point-mutant pCMV6-Arc-Myc-FLAG  
261 plasmids prepared using site-directed mutagenesis and subcloned similarly. Starter bacteria  
262 cultures grown overnight at 37°C in LB supplemented with ampicillin and chloramphenicol were  
263 used to seed large volume (500 mL) cultures. Those were grown at 37°C and 300 rpm until an  
264 OD<sub>600</sub> of 0.6-0.8 at which point they were induced by the addition isopropyl-β-D-thiogalactoside  
265 (IPTG) to a final concentration of 20 mM and incubated at 16°C for 16-20 h shaking (300 rpm).  
266 Subsequently, cultures were pelleted at 6,000 x g for 15 min at 4°C followed by resuspension of  
267 pellets in 30 mL of GST Buffer (50 mM Tris [pH 8.0], 300 mM NaCl, 10% glycerol) supplemented  
268 with 3 mM β-mercaptoethanol and 2 mM phenylmethylsulfonyl fluoride (PMSF) to limit protease  
269 activity. Resuspended cells were sonicated for 8-10 x 45 s pulses at duty load 60%, then insoluble  
270 material pelleted at 21,000 x g for 45 min. Supernatant was filtered with a 0.45 μm filter then left  
271 to equilibrate overnight with 1 mL of Glutathione Sepharose 4B affinity resin (GE Healthcare,  
272 Pittsburgh, PA, USA, #17-0756-01). Glutathione Sepharose 4B resin and bound protein was  
273 applied to a 10 mL disposable plastic column and washed thrice with 3 mL of wash buffer (GST  
274 Buffer + 0.1% Triton X-100). Elution of bound protein was accomplished by incubating 6 x 0.5  
275 mL of GST Elution Buffer (50 mM Tris [pH 8.0], 300 mM NaCl, 10% glycerol, 10 mM reduced  
276 glutathione, 1 mM DTT) with the resin for 10 minutes at room temperature before elution. Finally,  
277 fractions were verified by SDS-PAGE for purified proteins and those with recombinant GST-Arc  
278 were pooled, buffer exchanged (Dialysis Buffer: 20 mM Tris [pH 7.5], 200 mM NaCl, 25%  
279 glycerol, 1 mM DTT), and concentrated using Amicon Ultra-4 Centrifugal Filer Units – 10,000  
280 NMWL (Millipore, Sigma-Aldrich, #UFC801024) at 7,500 x g for 20 min.

281 For electron microscopy and dynamic light scattering experiments, the GST tag was cleaved  
282 using the Thrombin CleanCleave Kit (Sigma-Aldrich, SLBZ7194) according to the manufacture's

283 protocol after elution step. Samples were run on a HiPrep S16/60 Sephacryl S-200 HR (GE  
284 Healthcare, #17-1166-01) to separate the proteins by molecular weights and then verified by SDS-  
285 PAGE (Figure S1). Eluates containing cleaved Arc in 50 mM Tris (pH 8.0), 300 mM NaCl, and  
286 10% glycerol were pooled and normalized.

287

#### 288 *Kinase assay*

289 ADP-Glo Kinase Assay reagents were from Promega (Madison, WI, USA). Reactions were  
290 performed according to manufacturer's protocol with 1  $\mu$ M full-length GST-tagged mouse Arc  
291 and 10 nM of human TNIK catalytic domain (Carna Biosciences, Japan, #07-138) in reaction  
292 buffer (50 mM Tris [pH 7.5], 5 mM  $MgCl_2$ , 0.01% Brij-35). Reactions were initially conducted  
293 with a range of ATP concentrations (31.25, 62.5, 125, and 250  $\mu$ M). For experiments with TNIK  
294 inhibitor KY-05009 and the inactive analog G883-2176, compounds were pre-incubated for 15  
295 minutes before addition of ATP (125  $\mu$ M). Kinase reactions in all experiments were allowed to  
296 proceed for 60 min at room temperature and terminated by addition of ADP-Glo Reagent followed  
297 by incubating for 45 min at room temperature to deplete the remaining ATP. Next, Kinase  
298 Detection Reagent was performed for 15 min to convert ADP product to ATP and the newly  
299 synthesized ATP was measured via a luciferase/luciferin reaction with the help of luminometer  
300 plate reader.

301 For western blot analyses, kinase reactions performed with 400  $\mu$ M ATP were terminated by  
302 adding 2X Laemmli buffer and 30  $\mu$ L of each sample was run on SDS-PAGE. Membranes were  
303 then incubated for 48 h with mouse pan-phosphoserine/threonine antibody and processed as  
304 described above. Finally, to identify the specific Arc residues modified by TNIK in assay, a kinase  
305 reaction was separated by SDS-PAGE, Coomassie blue stained, and the band corresponding to  
306 GST-Arc excised and in-gel digested using trypsin followed by mass spectrometric analysis.

307

#### 308 *Actin fractionation assay*

309 Neuro2a cells cultured in 6-well plates overexpressing WT or point-mutants Arc-Myc-FLAG were  
310 collected with Triton X-100 lysis buffer (1% Triton X-100, 150 mM NaCl, 20 mM Tris-HCl  
311 [pH7.5]; 200  $\mu$ L per well) supplemented with protease inhibitors, incubated at room temperature  
312 for 10 min and then centrifuged at 14,000 rpm for 10 min. Next, equal volume (150  $\mu$ l) of  
313 supernatant representing the Triton X-100 soluble fraction with globular actin (G-actin) from each

314 tube was collected without disrupting the pelleted material, quantified, normalized, and stored at -  
315 80°C. In parallel, 100  $\mu$ L of fresh lysis buffer was added to each tube with the non-soluble fraction  
316 and the pellet gently resuspended with pipetting followed by centrifugation at 14,000 rpm for 5  
317 minutes. After centrifugation, the supernatant was discarded and the remaining pellet representing  
318 the insoluble filamentous actin (F-actin) fraction dissolved in 50  $\mu$ L of 1X SDS-LB. Equal amount  
319 of soluble (G-actin) and insoluble (F-actin) samples were run on SDS-PAGE and the membrane  
320 probed for  $\beta$ -actin, FLAG, and GAPDH.

321

### 322 *Immunocytochemistry and actin phalloidin staining*

323 Indirect immunofluorescence detection of antigens was carried out using Neuro2a cells  
324 cultured on glass coverslips in 6-well plate at an approximate density of  $1.0 \times 10^6$  cells/mL. After  
325 transfection of pRK5-Arc-GFP according to manufacturer's protocol, cells were washed twice  
326 with phosphate-buffered saline (PBS) and fixed for 30 min at room temperature with 4%  
327 paraformaldehyde in PBS. After fixation, cells were washed twice with PBS, permeabilized with  
328 PBST (PBS and 0.25% Triton X-100) for 20 min, blocked in blocking solution (5%  
329 goat nonimmune serum and 1% bovine serum albumin in PBS) for another 30 min, and finally  
330 incubated overnight at 4°C with the primary antibody in blocking solution. The following day,  
331 coverslips were extensively washed with PBS and incubated for 2 hours at room temperature in  
332 the appropriate fluorophore-conjugated secondary antibody solution [Alexa Fluor 488- or Alexa  
333 Fluor 594-conjugated secondary antibody (Molecular Probes, Thermo Fisher Scientific) in  
334 blocking solution]. Fluorescent labelling of F-actin was performed using Alexa Fluor 594-  
335 conjugated phalloidin (Invitrogen, Thermo Fisher Scientific, A12381) according to manufacturer's  
336 protocol. Finally, cell nuclei were counterstained with 4',6-diamidino-2-phenylindole (DAPI), and  
337 coverslips were mounted on glass slides with ProLong Antifade reagent (Invitrogen, Molecular  
338 Probes).

339 Cells cultured on coverslips from three independent biological replicates were imaged with a  
340 Nikon Eclipse Ti2-E inverted microscope equipped with a motorized stage, image stitching  
341 capability, and a 60X oil immersion objective (Nikon Instruments, Melville, NY, USA). Image  
342 preparation, assembly, and analysis were performed with Nikon's NIS-Elements, ImageJ, and  
343 Adobe Photoshop 2020. Change in contrast and evenness of the illumination was applied equally  
344 to all images presented in the study.

345

346 *Electron microscopy*

347 For negative stain electron microscopy, 5  $\mu$ L of recombinant Arc protein sample was applied to a  
348 copper 200-mesh grid for one-minute followed by removal of excess solution using filter paper.  
349 The grid was placed onto a droplet of 1% uranyl acetate for one minute, then excess wicked away.  
350 Finally, grids were air dried and imaging was performed on a Tecnai G2 F20 (FEI, Hillsboro, OR,  
351 USA). Uniformity within the grid was visually inspected before image acquisition. For measure  
352 of circumference and circularity of capsid formations, ImageJ software was used to outline  
353 manually each structure and extrapolate values according to set scale bar.

354

355 *Dynamic light scattering*

356 Dynamic light scattering (DLS) was performed using a Malvern Zetasizer ZS (Malvern, UK).  
357 Temperature scans and size measurements were carried out at a fixed scattering angle of  $173^\circ$   
358 (back scatter). Purified protein preparations were diluted to 10  $\mu$ M in size exclusion buffer (150  
359 mM NaCl, 50 mM Tris-HCl [pH 7.5]) and size measurements were made at 20°C and 30°C. Three  
360 replicates were performed for each protein, consisting of ten measurements at each temperature,  
361 with each measurement being the average of 12 runs. Data analysis was performed on intensity  
362 and volume size distribution curves and the Z-average size was calculated using Malvern DTS  
363 software. The Z-average (presented) provides a reliable measure of the mean size of the particle  
364 size distribution.

365

366 *Statistical analyses*

367 All statistical calculations were completed with KaleidaGraph 4.5 (Synergy Software, Reading,  
368 PA, USA) or SPSS Statistics 26 (IBM, Armonk, NY). No statistical methods were employed to  
369 predetermine sample size of any of the presented experiments. Statistical analysis included  
370 normality testing, outliers test, and Levene's test for equality of variance were completed before  
371 moving forward with parametric tests. One-way ANOVA followed by Tukey's post hoc test for  
372 multiple comparisons were performed where indicated. A value of  $p \leq .05$  was considered  
373 statistically significant. No test for outliers was conducted and no data point was excluded. Unless  
374 mentioned otherwise, all results represent the mean  $\pm$  SEM from at least three independent  
375 experiments ( $n = 3$ ).

376

377 *Notes on Study Design*

378 This study was exploratory and did not involve pre-registration, randomization, or blinding.

379

380 **Results**

381 *Mapping of Arc phosphorylation by mass spectrometry*

382 Previous studies have provided support for the phosphorylation of Arc at T175, S206, S260, and  
383 T380 in living cells (Nikolaienko *et al.* 2017; Gozdz *et al.* 2017; Zhang *et al.* 2019); however,  
384 sequence and structure-based prediction with NetPhos 3.1 (Blom *et al.* 1999) suggests the  
385 possibility that many more residues of this protein could be modified by different kinases. As an  
386 unbiased attempt to collect novel evidence of Arc serine, threonine, and tyrosine phosphorylation  
387 under biological conditions, we overexpressed mouse Arc-Myc-FLAG in Neuro2a cells,  
388 immunopurified the protein, and performed mass spectrometry. Excitingly, this effort allowed us  
389 to not only confirm phosphorylation events previously reported by other groups, like Y274  
390 (Palacios-Moreno *et al.* 2015) and T380 (Gozdz *et al.* 2017), but also to identify 15 new candidate  
391 phosphorylation sites (Supplementary Table 1). We noted in our dataset that the Arc peptides  
392 detected 50 times or more with a specific residue phosphorylated were all located in the N- and C-  
393 termini regions of the protein (Figure 1a). Specifically, we found T7, T8, and S67 at the amino-  
394 terminus, and S366, T376, and T380 at the carboxyl-terminus, as sites that are abundantly  
395 phosphorylated in Neuro2a cells. As we were examining with attention the surrounding sequences  
396 of these six amino acids, we recognized that Arc S67 forms a recently discovered phosphorylation  
397 consensus sequence (SVGK) for TNIK (Figure 1c) (Wang *et al.* 2016)—a serine/threonine protein  
398 kinase that is highly expressed in neurons throughout the mouse brain (Burette *et al.* 2015) and  
399 considered as a key regulator of signaling pathways contributing to cognitive function (Coba *et al.*  
400 2012). Since no evidence of a connection between Arc and TNIK had been reported to date, we  
401 consequently decided to explore the possibility of a direct biochemical interaction between these  
402 two proteins.

403

404 *Evidence of Arc as a substrate of TNIK*

405 Direct molecular associations have been described between TNIK and several neuronal proteins,  
406 including the scaffold protein Disrupted in Schizophrenia 1 (DISC1) (Camargo *et al.* 2007; Wang

407 *et al.* 2011), the E3 ubiquitin ligase Neuronal precursor cell expressed and developmentally  
408 downregulated protein 4-1 (Nedd4-1) (Kawabe *et al.* 2010), as well as the A-kinase anchoring  
409 protein 9 (Akap9) (Coba *et al.* 2012). To determine whether TNIK can also connect with Arc we  
410 then attempted to co-immunoprecipitate both proteins. As shown in Figure 1c, immunopurification  
411 of endogenous TNIK from Neuro2a cell lysates simultaneously pulled down overexpressed Arc-  
412 Myc-FLAG. Further, performing the same assay but in the opposite direction where FLAG-tagged  
413 Arc was purified first also isolated endogenous TNIK (Figure 1d).

414 These positive results motivated us to next test if this interaction between the two proteins  
415 could be extended to evidence of Arc phosphorylation by TNIK. As a starting point, we completed  
416 an exhaustive set of *in vitro* ADP-Glo kinase assays that combined bacterially expressed full-  
417 length GST-Arc and the catalytic domain of human TNIK (amino acids 1-314). Here, we measured  
418 fluorescence signals suggesting TNIK-dependent Arc phosphorylation in a manner that  
419 consistently increase with the concentration of ATP added to the assay buffer (Figure 2a). Most  
420 importantly, the measured fluorescence signal at each tested ATP concentration was significantly  
421 higher than the ones measured in the control assay reaction that combined TNIK and GST or the  
422 one that included TNIK only (Figure 2a). To confirm that the difference in fluorescence quantified  
423 between these different experimental conditions corresponded specifically to Arc phosphorylation,  
424 we then performed a western blotting analysis with ADP-Glo reaction samples and a pan-  
425 phosphoserine/threonine antibody. As seen on Figure 2b, a distinct band matching the molecular  
426 weight of GST-Arc was detected for the complete sample, but not when GST-Arc, ATP, or the  
427 TNIK catalytic domain protein was omitted from the reaction. Interestingly, a second band  
428 observed slightly below the presumed GST-Arc signal and matching the molecular weight of the  
429 TNIK catalytic fragment used in the assay, was also detected from the complete reaction  
430 sample (Figure 2b). Since TNIK protein has four TNIK auto-phosphorylation consensus motifs,  
431 including one found between the amino acids 181-184 (TVGR), we interpreted this unexplained  
432 lower signal on the western blot as TNIK phosphorylation on itself. In order to test this hypothesis  
433 more directly, as well as further confirm that the fluorescence signal in complete ADP-Glo reaction  
434 samples corresponded to an effect of TNIK on Arc, we repeated the assay but with addition of the  
435 TNIK inhibitor KY-05009 (Figure 2c) (Kim *et al.* 2014). As expected, the presence of KY-05009  
436 to a complete ADP-Glo reaction reduced the fluorescence signal in a dose-dependent manner when  
437 TNIK is the only protein present in the reaction or both TNIK and GST-Arc are included (Figure

438 2d). Of note, repeating the TNIK + GST-Arc experiment but with application of the KY-05009  
439 inactive analog G883-2176 did not produced inhibition of the kinase reaction (Figure 2e). Finally,  
440 effect of KY-05009 on the phosphorylation of GST-Arc was also confirmed by western blot  
441 analysis probing with a pan-phosphoserine/threonine antibody (Figure 2f). Taken together, these  
442 results strongly suggest that Arc can be phosphorylated by TNIK *in vitro*.

443

#### 444 *TNIK modifies Arc residues at multiple sites*

445 In order to test our hypothesis that TNIK can phosphorylate Arc at S67, we submitted GST-Arc  
446 from an ADP-Glo reaction sample to mass spectrometry analysis. As expected, Arc peptides  
447 including S67 were detected with a mass change at that location indicating phosphorylation,  
448 however, three other fragments were also detected with the amino acids S132, T278, and S366  
449 modified in a similar fashion (Figure 3a). Two of those residues (S132 and T366) were found in  
450 our initial mass spectrometry screen (Figure 1a) but are not related to sequence arrangements  
451 currently known to be targeted by TNIK (Wang *et al.* 2016). As for T278, though, examination of  
452 the sequences immediately surrounding it revealed that this residue is, in fact, part of a TNIK  
453 phosphorylation consensus sequence (TL<sub>2</sub>SR), consistent with its detection.

454 Arc sequence alignment between different tetrapods show that the TNIK consensus sequences  
455 associated with S67 and T278 are both highly conserved in mammals, birds, and reptiles (Figure  
456 3b). Most interestingly, these two residues are found on opposite sides of Arc's central linker and  
457 within regions that have very different biophysical characteristics and function (Figure 3c).  
458 Specifically, S67 is located in the positively charged N-terminal side of the protein, within the first  
459 alpha coil (Coil-1, residues 20-77) of a predicted anti-parallel coiled-coil domain that is thought to  
460 play a role in oligomerization as well as lipid membrane binding (Hallin *et al.* 2018). In addition,  
461 work done by Korb and colleagues (2013) also provided evidence that the Arc protein segment  
462 including amino acids 29-78 could act as a nuclear retention domain (NRD). As for T278, it is  
463 located on the negatively charged C-terminal side of the protein, precisely at the transition between  
464 the N-lobe and C-lobe of the bilobar structure homologous to the retroviral Gag capsid domain  
465 (Figure 3c). Notably, the Arc N-lobe is critical to its association with postsynaptic proteins,  
466 including CaMKII and TARP $\gamma$ 2 (Zhang *et al.* 2016; Hallin *et al.* 2018). Based on that information,  
467 we reasoned that action of TNIK at S67 and T278 could each have very different impact on Arc  
468 biology.



469

470 *Influence of Arc phosphorylation at S67 and T278 on its distribution with F-actin*

471 In order to gain further insights as to how phospho-modifications could influence Arc in cells, we  
472 next performed a series of experiments using overexpression of point-mutant phosphomimic and  
473 unmodifiable proteins to see how those affect its cellular distribution and oligomerization.  
474 Evidence of interaction between Arc and the cytoskeleton protein actin include the ability of  
475 recombinant Arc to recruit F-actin from crude cellular preparations (Lyford *et al.* 1995), the  
476 inhibitory influence of Arc on the actin severing protein cofilin in the dentate gyrus (Messaoudi *et*  
477 *al.* 2007), as well as the fact that Arc exogenously expressed in primary hippocampal neurons  
478 localize with actin in dendritic spines and produce changes in the shape of these fine structures  
479 (Peebles *et al.* 2010). Based on these findings we hypothesized that phosphorylation of Arc at S67  
480 or T278 could influence the interaction of Arc with F-actin. To test this possibility, we used  
481 Neuro2a cells overexpressing WT Arc-Myc-FLAG or a mutant version (phosphomimic or  
482 unmodifiable) of the protein for each site of interest (S67D, T278D, S67A, T278A) and performed  
483 actin co-sedimentation assays. As presented in Figures 4a and 4b, western blots for Arc with a  
484 FLAG antibody show that the five variants of the protein all had a similar expression level in the  
485 fraction with enriched G-actin (Triton X-100 soluble proteins). Most interestingly, though, probing  
486 for Arc in a similar fashion but in samples enriched for F-actin (Triton X-100 insoluble proteins)  
487 revealed that Arc unmodifiable at S67 (serine to alanine, S67A) was essentially absent from this  
488 fraction whereas the other forms of Arc (WT, S67D, T278D, and T278A) tested were similarly  
489 abundant (Figure 4a). This clear-cut result may be interpreted as the need for Arc S67  
490 phosphorylation for its interaction with F-actin, but the performed actin co-sedimentation assay  
491 does not inform about the possibility that the Arc S67A mutant could be instead sequestered away  
492 from this major component of the cytoskeleton. To assess this possibility, we performed  
493 fluorescence immunostaining for FLAG on Neuro2a cells expressing each construct in  
494 combination with fluorescence phalloidin staining to reveal F-actin. With this approach, we first  
495 observed that WT Arc and the other mutants that co-sedimented with F-actin in our previous test  
496 (S67D, T278D, and T278A) distributed widely in transfected Neuro2a cells, including in close  
497 juxtaposition with fluorescence signals specific to phalloidin staining (Figure 4c). Interestingly,  
498 though, cells expressing Arc-Myc-FLAG S67A presented immunostaining suggesting strong  
499 accumulation of the mutant protein in the nucleus with very limited amount found in the cytoplasm

500 (Figure 4c). Taken together, these results suggest that lack of co-sedimentation of Arc S67A with  
501 F-actin (Figure 4a) that we observed is mainly attributable to the fact that phosphorylation of this  
502 site is apparently required for trafficking of the protein out from the nucleus to the cytoplasm.

503

#### 504 *Modification of Arc S67 attenuates its interaction with Drebrin*

505 Drebrin contributes to dendritic spine growth and plasticity by favoring formation of stable actin  
506 filaments (Koganezawa *et al.* 2017). Of note, Nair and colleagues (2017) have shown direct  
507 binding of Arc with drebrin A during LTP consolidation, and other research has also uncovered a  
508 role for this F-actin binding protein in trafficking of the CaMKII beta subunit (Yamazaki *et al.*  
509 2018)—a protein that, interestingly, is also known to specifically sequester Arc at inactive  
510 synapses (Okuno *et al.* 2012). Considering those molecular connections, we then tested whether  
511 endogenous drebrin interaction with overexpressed Arc-Myc-FLAG would be affected when S67  
512 is mutated as an aspartic acid (phosphomimic) or alanine (unmodifiable) mutant. Consistent with  
513 our previous actin fractionation and fluorescence immunostaining experiments, co-  
514 immunoprecipitation of drebrin from Neuro2a cells with exogenously expressed Arc-Myc-FLAG  
515 was strongly reduced with the unmodifiable S67A Arc variant (Figure 5).

516

#### 517 *Phosphomimics of Arc S67 and T278 affect virus-like capsid formation differently*

518 Arc can self-assemble as particles resembling retroviral Gag capsids (Ashley *et al.* 2018; Pastuzyn  
519 *et al.* 2018; Erlendsson *et al.* 2020). For mammalian Arc, capsid formation requires the second  
520 alpha-helix (Coil-2, amino acids 78-140) of the N-terminal coiled-coil assembly (Eriksen *et al.*,  
521 2020) which allows association between the N-terminal region of one Arc monomer with the C-  
522 terminus of another (Byers *et al.* 2015; Myrum *et al.* 2015; Hallin *et al.* 2018) Since S67 is found  
523 just before the Coil-2 amino acid stretch mediating self-association, and that T278 is centrally  
524 positioned in the C-terminus segment that binds with the N-terminal region, change in charge  
525 caused by phosphorylation of either residue could have profound impact on how Arc monomers  
526 organize as capsid-like structures. To examine this possibility, we performed negative-stain  
527 transmission electron microscopy (EM) with recombinant Arc and noticed that capsids produced  
528 with WT and S67D variants have round, regular sized appearance while T278D appeared as large,  
529 irregular shaped aggregates (Figure 6a-c). Supporting these observations, we quantified that the  
530 circumference of WT and S67D Arc capsids had comparable average sizes of 65.04 nm and 68.73

531 nm, respectively, whereas T278D were significantly larger with an average span of 184.5 nm  
532 (Figure 6d). For circularity, we used built-in ImageJ calculation (scale of 0-1 where 1 is perfectly  
533 circular and 0 is a line) and found that Arc S67D capsids presented a significantly higher circularity  
534 score (0.91) than both WT (0.85) and T278D (0.65) examples, with the last two conditions also  
535 significantly different from each other (Figure 6e). Finally, to corroborate the effect of the S67D  
536 and T278D point-mutations on homogeneity and oligomerization of Arc we performed dynamic  
537 light scattering (DLS) analysis. With this approach, we measured a size distribution of  $27.5 \pm$   
538  $5.0\text{nm}$  (35%) and  $307.7 \pm 173.0\text{ nm}$  (65%) at  $20^\circ\text{C}$ , and  $50.2 \pm 32.7\text{ nm}$  (26%) and  $333.00 \pm 68.4$   
539  $\text{nm}$  (74%) at  $30^\circ\text{C}$  for WT Arc;  $38.9 \pm 1.5\text{ nm}$  (48%) and  $274.8 \pm 119.6\text{ nm}$  (52%) at  $20^\circ\text{C}$ , and  
540  $38.9 \pm 1.5\text{ nm}$  (52%) and  $294.6 \pm 105.2\text{ nm}$  (48%) at  $30^\circ\text{C}$  for Arc S67D; and  $25.4 \pm 7.9\text{ nm}$  (13%)  
541 and  $423.7 \pm 47.8\text{ nm}$  (87%) at  $20^\circ\text{C}$  and  $376.3 \pm 29.9\text{ nm}$  (100%) at  $30^\circ\text{C}$  for Arc T278D (Figure  
542 7f). In sum, those results are consistent with a previous DLS experiment for WT Arc (Myrum *et*  
543 *al.*, 2015), and confirm the strong tendency of T278D Arc to organize as large aggregates.

544

## 545 **Discussion**

546 As a hub protein expressed in different parts of neuronal cells, very little is known about what  
547 guides Arc towards specific interactions and processes both spatially and temporally. Postulating  
548 that PTMs could play a pivotal role in providing specificity, we probed exogenous Arc-Myc-  
549 FLAG immunopurified from Neuro2a cells with mass spectrometry to identify residues modified  
550 by phosphorylation. While considering the various candidates that we had detected with this  
551 approach, we recognized S67 and T278 as possible targets for TNIK—a kinase that had not been  
552 directly investigated in relation to Arc even though both proteins share tantalizing similarities  
553 concerning their expression and contribution to neuron biology. Using *in vitro* kinase assays and  
554 proteomics, we confirmed that TNIK can indeed phosphorylate Arc at S67 and T278. Furthermore,  
555 we uncovered that both amino acids strongly influence, each in their own way, Arc's subcellular  
556 distribution and/or oligomerization as virus-like capsids. Above all, our study provides evidence  
557 for a potential multifaceted interplay between Arc and TNIK. Better understanding of their  
558 connection in neuronal cells will assuredly provide valuable new insights about synaptic plasticity,  
559 the molecular underpinnings of cognition, and how disruption of their interaction could be an  
560 important factor in the apparition and progression of certain brain disorders.

561

562

563 *Neuronal TNIK*

564 TNIK is highly expressed in the mammalian brain where it is not only enriched in postsynaptic  
565 densities and synaptosomal fractions (Jordan *et al.* 2004; Peng *et al.* 2004; Trinidad *et al.* 2008),  
566 but also found in neuronal nuclei where it is an active regulator of protein complex formation  
567 (Coba *et al.* 2012). Notably, Burette and colleagues (2015) have provided convincing microscopy  
568 evidence confirming accumulation of TNIK in postsynaptic densities throughout the adult mouse  
569 brain, which aligns with results showing that TNIK KO mice have significant learning deficits and  
570 altered synaptic function (Coba *et al.* 2012). At the molecular level, TNIK was found to interact  
571 with Disc1 to regulate key synaptic proteins like glutamate receptors and postsynaptic density  
572 protein 95 (PSD-95) (Camargo *et al.* 2007; Wang *et al.* 2011). Finally, it is also known that TNIK  
573 is an effector of the GTPase Rap2 through which it regulates dendrite patterning and synapse  
574 formation (Taira *et al.* 2004; Hussain *et al.* 2010). Together, those results support the exciting  
575 possibility that neuronal TNIK could act on different Arc residues in a manner that is specific to  
576 each subcellular compartment where both proteins overlap.

577

578 *Arc S67 phosphorylation and trafficking to nuclear compartment*

579 Our study focused on Arc S67 and T278 as direct targets of TNIK activity. Taken together, our  
580 findings show that phosphorylation of each site produces very unique effects in Neuro2a cells.  
581 Starting with S67, which is found within the first alpha coil of Arc's coiled-coil assembly (Figure  
582 3c), we observed a drastic loss of co-sedimentation of Arc with F-actin when this residue is  
583 modified to alanine to produce an unmodifiable point-mutant variant. Importantly,  
584 immunostaining and co-immunoprecipitation experiments suggest that this result is not  
585 attributable to loss of Arc interacting with F-actin, but rather to the sequestration of the mutant  
586 protein in the nuclear compartment. A possible interpretation of why Arc S67A strongly  
587 accumulates in the nucleus is provided by the discovery of a NRD in Coil-1 that includes residue  
588 S67 (Korb *et al.* 2013). Precisely, although Arc is small enough to diffuse into the nucleus, its  
589 import is apparently regulated by a Pat7 nuclear localization signal at amino acids 331-335 (Figure  
590 3c). Once inside the nuclear compartment, evidence suggest that Arc is retained there by the NRD  
591 which limits the activity of an adjacent nuclear export signal (NES) found at residues 121-154 by  
592 favoring interactions with other molecular components (Korb *et al.* 2013). Interestingly, our

593 finding of a quasi-complete sequestration of unmodifiable S67A Arc suggest that phosphorylation  
594 at this specific site is required for the release of Arc from its nuclear interactors to then allow  
595 export. Known nuclear molecular interactions of Arc include the formation of a complex  
596 composed of the  $\beta$ -spectrin isoform  $\beta$ SpIV $\Sigma$ 5, promyelocytic leukemia (PML) bodies, and  
597 acetyltransferase Tip60 that organize to increase acetylation of histone 4 at lysine 12 (Bloomer *et*  
598 *al.* 2007; Wee *et al.* 2014). Whether TNIK could intervene as a negative regulator of this process  
599 by phosphorylating Arc at S67 to stimulate its nuclear export is an interesting possibility worth  
600 future investigation.

601

#### 602 *Influence of S67 and T278 on Arc oligomeric status*

603 In addition to the characterization of its subcellular distribution in relation to F-actin, we also  
604 analyzed how Arc recombinant protein can self-assemble as virus-like capsids using EM imaging.  
605 With this approach, we found an effect for S67 where mimicking phosphorylation of that site  
606 (S67D) made the capsids more circular, but not different in terms of average circumference, when  
607 compared to those obtained with WT Arc. Our most striking result, however, was collected with  
608 the T278D phosphomimic variant where oligomeric structures were significantly bigger and  
609 irregular than those prepared with S67D or WT (Figure 6d-e). This result can be explained by the  
610 biophysical properties of Arc and how those are possibly affected differently by S67 and T278  
611 phosphorylation. As illustrated in Figure 7a, monomeric full-length Arc is a compact, closed  
612 structure in which the oppositely charged N-terminal domain (positive) and C-terminus region  
613 (negative) are juxtaposed, and the flexible linker between them is compacted (Hallin *et al.* 2018).  
614 When Arc molecules assemble as capsids, the same principle applies but in a domain swapping  
615 manner where the N-terminal and C-terminus of distinct monomers connect together (Figure 7b).  
616 Considering this information, it is important to recognize that phosphorylation of S67 will result  
617 in a decrease of the N-terminal positive charge (Figure 7c), making presumably molecular  
618 exchange more fluid, while phosphorylation of T278 will inversely result in stronger affinity due  
619 to increased net negative charge of the C-terminus (Figure 7d). Since Arc oligomerization involves  
620 domain swapping assembly between the N-terminal and C-terminus amongst monomers, it is then  
621 not surprising that mimicking phosphorylation at S67 and T278 separately produce very different  
622 effects. For S67, exchange between individual Arc molecules is expected to be more evenly  
623 distributed because of the reduced interaction strength between binding units. On the other hand,

624 phosphorylation of T278 will cause tighter binding making dissociation between Arc molecules  
625 more difficult once formed. In other words, the presence of larger aggregate-like assemblies that  
626 we measured with the Arc T278D variant should be attributed to greater contact affinity with  
627 reduced likelihood of dissociation. Finally, the fact that no capsid-like structures with the expected  
628 average size (about 32 nm according to Pastuzyn *et al.*, 2018) were measured for Arc T278D at a  
629 temperature (30°C) in our DLS data further support this interpretation.

630

631 *Implications of TNIK-dependent Arc phosphorylation for neuron biology and brain disorders*

632 Our study supports the need for a systematic search and evaluation of TNIK-dependent Arc  
633 phosphorylation events in neuronal cells. As already hypothesized above, one possible function of  
634 TNIK in the nucleus could be to promote Arc export to the cytoplasm by limiting the influence of  
635 its NRD via S67 phosphorylation. In dendrites and postsynaptic structures, our accumulated  
636 knowledge about Arc and TNIK suggest that a direct relationship between those two proteins could  
637 unfold in many ways with important ramifications to neuroplasticity, cognition, and behavior. A  
638 scenario involving modification of T278 would be to alter Arc's association with synaptic effectors  
639 that have been recognized to bind its C-terminus Gag domain. Intermolecular interactions  
640 deserving close attention include TARP $\gamma$ 2 (Zhang *et al.* 2016), a transmembrane protein that  
641 connects with AMPARs and mediate critical aspects of their trafficking and gating properties  
642 (Jackson and Nicoll 2011), as well as Psd-95 that can recruit Arc in an activity-dependent manner  
643 to postsynaptic densities to create supercomplexes with neurotransmitter receptors and auxiliary  
644 proteins (Fernandez *et al.* 2017). In line with the idea of TNIK targeting T278 to alter synaptic  
645 interactions, it is interesting to highlight that Arc association with the GluN2A and GluN2B  
646 subunits of N-methyl-D-aspartate-type glutamate receptors (NMDARs) has been recently found  
647 to favor stabilization of the monomeric state and prevent the formation of higher order oligomeric  
648 structures (Nielsen *et al.* 2019). Hence, phosphorylation of T278 in this case would be expected to  
649 diminish monomeric Arc association with NMDARs to promote instead formation of oligomeric  
650 structures for intercellular communication. Finally, it is critical to consider our speculations about  
651 TNIK-dependent Arc phosphorylation in light of the fact that the occurrence of Arc T278  
652 phosphorylation was previously reported by two separate studies using a mass spectrometry  
653 approach, including global characterization of murine synaptosomes for O-GlcNAcylation and  
654 phosphorylation (Trinidad *et al.* 2012), and more recently with endogenous Arc immunopurified

655 from adult WT mouse forebrain (Zhang *et al.* 2019) Although Arc T278 phosphorylation from  
656 brain and cultured neurons has not been validated yet with a specific phospho-Arc Thr278  
657 antibody, neither its origin related to the activity of a specific kinase, these efforts certainly provide  
658 a degree of assurance that this site fulfill a functional role *in vivo*.

659 One final point important to highlight is that Zhang and colleagues (2019) also used DLS in  
660 their work to evaluate the oligomerization of Arc T278D recombinant protein and report the  
661 formation of tetramers at 20°C and high-order oligomers at 30°C, but only of smaller size than WT  
662 Arc. This is, interestingly, different from our result of only large aggregate-like formation with  
663 Arc T278D at 30°C—an observation that we are supporting with EM evidence (Figure 6). We  
664 believe that this discrepancy between the two studies could be attributable to technical differences  
665 in the preparation of recombinant GST-Arc, tag cleavage, and/or composition of buffers used in  
666 the DLS experiment. Specifically, Zhang and colleagues (2019) included reducing (DTT) and  
667 chelating (EDTA) agents in their buffer for DLS experiment, which we did not do to be consistent  
668 with our EM buffer condition. Furthermore, we noticed when optimizing our DLS protocol that  
669 filtering the recombinant protein solutions with a 0.22  $\mu$ M syringe filter before analysis almost  
670 completely eliminated the measured T278D large population species at 30°C, which led us to omit  
671 this step for all conditions in our final analysis. Hence, performing such manipulation could have  
672 influenced the overall presence of protein aggregates within preparations and influenced end  
673 results.

674 In summary, better understanding TNIK-dependent Arc phosphorylation in neurons could  
675 offer valuable new insights about brain disorders, in particular those like schizophrenia for which  
676 accumulating evidence suggest that aberrant synaptic Arc molecular interactions are contributing  
677 to disease apparition and progression (Managò and Papaleo 2017). In line with this possibility,  
678 uncontrolled TNIK activity, which is thought to occur as a result of disruptive mutations to the  
679 psychiatric disease risk factor *Disc1* (Wang *et al.* 2011), could then directly extend to major  
680 functional changes on downstream neuronal substrates like Arc. Given the dynamic nature of Arc-  
681 mediated neuroplasticity, future studies seeking to probe the potential role of TNIK in regulating  
682 Arc oligomerization, self-assembly as virus-like capsids, and interactions with synaptic proteins  
683 like the NMDA receptor, will benefit from using newly developed, selective inhibitors and other  
684 modulators of TNIK kinase activity that are under development with the long-term goal of  
685 validating potential novel therapeutic targets for the neuropsychiatric disorders (Read *et al.* 2019).

686 **Acknowledgements and conflict of interest disclosure**

687 This project was supported by the Natural Sciences and Engineering Research Council of Canada  
688 (NSERC grant 401389 to J.L.), the Canadian Foundation for Innovation (CFI grant 037755 to  
689 J.L.), AstraZeneca postdoctoral program (J.L./S.J.H.), NIMH/NIH R01MH095088 (S.J.H.) and  
690 the Stuart & Suzanne Steele MGH Research Scholars Program (S.J.H.). A.W.M was supported by  
691 the University of Guelph (Graduate Tuition Scholarship). In memoriam of Robert (Bob) Harris  
692 (Advanced Analysis Centre, University of Guelph) who provided generous assistance with  
693 electron microscopy.

694

695 S.J.H. was or is a member of the scientific advisory board of Rodin Therapeutics, Psy Therapeutics,  
696 Frequency Therapeutics, Vesigen Therapeutics and Souvien Therapeutics, none of whom were  
697 involved in this study. S.J.H. has also received speaking or consulting fees from Amgen,  
698 AstraZeneca, Biogen, Merck, Regenacy Pharmaceuticals, Syros Pharmaceuticals, as well as  
699 sponsored research or gift funding from AstraZeneca, JW Pharmaceuticals, Juvenescence, and  
700 Vesigen unrelated to the content of this manuscript. N.J.B. was an employee and shareholders of  
701 AstraZeneca during the time the experiments described herein were conducted. The other authors  
702 declare no conflict of interest.

703

704 The authors declare this study was not pre-registered.

705

706 **Institutional approval**

707 Institutional approval was not required for this study; the experiments were approved at the  
708 national level.



709 **References**

- 710 Ashley J., Cordy B., Lucia D., Fradkin L. G., Budnik V., Thomson T., Ashley J., et al. (2018)  
711 Retrovirus-like Gag protein Arc1 binds RNA and traffics across synaptic boutons. *Cell* **172**,  
712 262–274.
- 713 Barylko B., Wilkerson J. R., Cavalier S. H., Binns D. D., James N. G., Jameson D. M., Huber K.  
714 M., Albanesi J. P. (2018) Palmitoylation and membrane binding of Arc/Arg3.1: A potential  
715 role in synaptic depression. *Biochemistry* **57**, 520–524.
- 716 Blom N., Gammeltoft S., Brunak S. (1999) Sequence and structure-based prediction of eukaryotic  
717 protein phosphorylation sites. *Journal of Molecular Biology* **294**, 1351–1362.
- 718 Bloomer W. A. C., Vandongen H. M. A., Vandongen A. M. J. (2007) Activity-regulated  
719 cytoskeleton-associated protein Arc/Arg3.1 binds to spectrin and associates with nuclear  
720 promyelocytic leukemia (PML) bodies. *Brain Research* **1153**, 20–33.
- 721 Burette A. C., Phend K. D., Burette S., Lin Q., Musen L., Foltz G., Taylor N., et al. (2015)  
722 Organization of TNIK in dendritic spines. *The Journal of Comparative Neurology* **523**, 1913–  
723 1924.
- 724 Byers C. E., Barylko B., Ross J. A., Southworth D. R., James N. G., Taylor C. A., Wang L., et al.  
725 (2015) Enhancement of dynamin polymerization and GTPase activity by Arc/Arg3.1.  
726 *Biochimica et Biophysica Acta - General Subjects* **1850**, 1310–1318.
- 727 Camargo L. M., Collura V., Rain J. C., Mizuguchi K., Hermjakob H., Kerrien S., Bonnert T. P.,  
728 Whiting P. J., Brandon N. J. (2007) Disrupted in Schizophrenia 1 interactome: Evidence for  
729 the close connectivity of risk genes and a potential synaptic basis for schizophrenia.  
730 *Molecular Psychiatry* **12**, 74–86.
- 731 Campillos M., Doerks T., Shah P. K., Bork P. (2006) Computational characterization of multiple  
732 Gag-like human proteins. *Trends in Genetics* **22**, 585–589.
- 733 Chowdhury S., Shepherd J. D., Okuno H., Lyford G., Petralia R. S., Plath N., Kuhl D., Huganir R.  
734 L., Paul F. (2006) Arc interacts with the endocytic machinery to regulate AMPA receptor  
735 trafficking. *Neuron* **52**, 445–459.
- 736 Coba M. P., Komiyama N. H., Nithianantharajah J., Kopanitsa M. v., Indersmitten T., Skene N.  
737 G., Tuck E. J., et al. (2012) TNIK is required for postsynaptic and nuclear signaling pathways  
738 and cognitive function. *The Journal of Neuroscience* **32**, 13987–13999.

- 739 Dasilva L. L. P., Wall M. J., Almeida L. P. De, Wauters S. C., Yunan C., Müller J., Corrêa S. A.  
740 L. (2016) Activity-Regulated Cytoskeleton-Associated protein controls AMPAR endocytosis  
741 through a direct interaction with Clathrin-Adaptor Protein 2. *eNeuro* **3**, e0144-15.2016.
- 742 Erlendsson S., Morado D. R., Cullen H. B., Feschotte C., Shepherd J. D., Briggs J. A. G. (2020)  
743 Structures of virus-like capsids formed by the *Drosophila* neuronal Arc proteins. *Nature*  
744 *Neuroscience* **23**, 172–175.
- 745 Fernandez E., Collins M. O., Frank A. W., Choudhary J. S., Komiyama N. H., Grant S. G. N.  
746 (2017) Arc requires PSD95 for assembly into postsynaptic complexes involved with neural  
747 dysfunction and intelligence. *Cell Reports* **21**, 679–691.
- 748 Gao X., Castro-Gomez S., Grendel J., Graf S., Süsens U., Binkle L., Mensching D., Isbrandt D.,  
749 Kuhl D., Ohana O. (2018) Arc/Arg3.1 mediates a critical period for spatial learning and  
750 hippocampal networks. *Proceedings of the National Academy of Sciences of the United States*  
751 *of America* **115**, 12531–12536.
- 752 Gozdz A., Nikolaienko O., Urbanska M., Bramham C. R., Jaworski J. (2017) GSK3 $\alpha$  and GSK3 $\beta$   
753 phosphorylate Arc and regulate its degradation. *Frontiers in Molecular Neuroscience* **10**, 192.
- 754 Greer P. L., Hanayama R., Bloodgood B. L., Mardinly A. R., Lipton M., Flavell S. W., Kim T., et  
755 al. (2010) The Angelman Syndrome protein Ube3A regulates synapse development by  
756 ubiquitinating Arc. *Cell* **140**, 704–716.
- 757 Hallin E. I., Bramham C. R., Kursula P. (2021) Structural properties and peptide ligand binding of  
758 the capsid homology domains of human Arc. *Biochemistry and Biophysics Reports* **26**,  
759 100975.
- 760 Hallin E. I., Eriksen M. S., Baryshnikov S., Nikolaienko O., Grødem S., Hosokawa T., Hayashi  
761 Y., Bramham C. R., Kursula P. (2018) Structure of monomeric full-length ARC sheds light  
762 on molecular flexibility, protein interactions, and functional modalities. *Journal of*  
763 *Neurochemistry* **147**, 323–343.
- 764 Hussain N. K., Hsin H., Hugarir R. L., Sheng M. (2010) MINK and TNIK differentially act on  
765 Rap2-mediated signal transduction to regulate neuronal structure and AMPA receptor  
766 function. *The Journal of Neuroscience* **30**, 14786–14794.
- 767 Jackson A. C., Nicoll R. A. (2011) The expanding social network of ionotropic glutamate  
768 receptors: TARPs and other transmembrane auxiliary subunits. *Neuron* **70**, 178–199.

- 769 Jakkamsetti V., Tsai N. P., Gross C., Molinaro G., Collins K. A., Nicoletti F., Wang K. H., et al.  
770 (2013) Experience-induced Arc/Arg3.1 primes CA1 pyramidal neurons for metabotropic  
771 glutamate receptor-dependent long-term synaptic depression. *Neuron* **80**, 72–79.
- 772 Jenks K. R., Shepherd J. D. (2020) Experience-dependent development and maintenance of  
773 binocular neurons in the mouse visual cortex. *Cell Reports* **30**, 1982–1994.
- 774 Jordan B. A., Fernholz B. D., Boussac M., Xu C., Grigorean G., Ziff E. B., Neubert T. A. (2004)  
775 Identification and verification of novel rodent postsynaptic density proteins. *Molecular and*  
776 *Cellular Proteomics* **3**, 857–871.
- 777 Kawabe H., Neeb A., Dimova K., Young S. M., Takeda M., Katsurabayashi S., Mitkovski M., et  
778 al. (2010) Regulation of Rap2A by the ubiquitin ligase Nedd4-1 controls neurite  
779 development. *Neuron* **65**, 358–372.
- 780 Kim J., Moon S. H., Kim B. T., Chae C. H., Lee J. Y., Kim S. H. (2014) A novel aminothiazole  
781 KY-05009 with potential to inhibit Traf2- And Nck-Interacting Kinase (TNIK) attenuates  
782 TGF- $\beta$ 1-mediated epithelial-to-mesenchymal transition in human lung adenocarcinoma  
783 A549 cells. *PLoS ONE* **9**, e110180.
- 784 Koganezawa N., Hanamura K., Sekino Y., Shirao T. (2017) The role of drebrin in dendritic spines.  
785 *Molecular and Cellular Neuroscience* **84**, 85–92.
- 786 Korb E., Wilkinson C. L., Delgado R., Lovero K. L., Finkbeiner S. (2013) Arc in the nucleus  
787 regulates PML dependent GluA1 transcription and homeostatic plasticity. *Nature*  
788 *Neuroscience* **16**, 874–883.
- 789 Lalonde J., Reis S. A., Sivakumaran S., Holland C. S., Wesseling H., Sauld J. F., Alural B., Zhao  
790 W., Steen J. A., Haggarty S. J. (2017) Chemogenomic analysis reveals key role for lysine  
791 acetylation in regulating Arc stability. *Nature Communications* **8**, 1659.
- 792 Lyford G. L., Yamagata K., Kaufmann W., Barnes C., Sanders L. K., Copeland N. G., Gilbert D.  
793 J., Jenkins N. A., Lanahan A. A., Worley P. F. (1995) Arc, a growth factor and activity-  
794 regulated gene, encodes a novel cytoskeleton-associated protein that is enriched in neuronal  
795 dendrites. *Neuron* **14**, 433–445.
- 796 Mabb A. M., Je H. S., Wall M. J., Robinson C. G., Rylan S., Qiang Y., Corrêa S. A. L., Ehlers M.  
797 D. (2014) Triad3A regulates synaptic strength by ubiquitination of Arc. *Neuron* **82**, 1299–  
798 1316.

- 799 Managò F., Papaleo F. (2017) Schizophrenia: What's Arc got to do with it? *Frontiers in Behavioral*  
800 *Neuroscience* **11**, 181.
- 801 McCurry C. L., Shepherd J. D., Tropea D., Wang K. H., Bear M. F., Sur M. (2010) Loss of Arc  
802 renders the visual cortex impervious to the effects of sensory experience or deprivation.  
803 *Nature Neuroscience* **13**, 450–457.
- 804 Messaoudi E., Kanhema T., Soulé J., Tiron A., Dagyte G., Silva B. Da, Bramham C. R. (2007)  
805 Sustained Arc/Arg3.1 synthesis controls long-term potentiation consolidation through  
806 regulation of local actin polymerization in the dentate gyrus *in vivo*. *The Journal of*  
807 *Neuroscience* **27**, 10445–10455.
- 808 Mikuni T., Uesaka N., Okuno H., Hirai H., Deisseroth K., Bito H., Kano M. (2013) Arc/Arg3.1 is  
809 a postsynaptic mediator of activity-dependent synapse elimination in the developing  
810 cerebellum. *Neuron* **78**, 1024–1035.
- 811 Myrum C., Baumann A., Bustad H. J., Flydal M. I., Mariaule V., Alvira S., Cuéllar J., et al. (2015)  
812 Arc is a flexible modular protein capable of reversible self-oligomerization. *Biochemical*  
813 *Journal* **468**, 145–158.
- 814 Nair R. R., Patil S., Tiron A., Kanhema T., Craig T. J. (2017) Dynamic Arc SUMOylation and  
815 selective interaction with F-Actin-binding protein Drebrin A in LTP consolidation *in vivo*.  
816 *Frontiers in Synaptic Neuroscience* **9**, 8.
- 817 Newpher T. M., Harris S., Pringle J., Hamilton C., Soderling S. (2018) Regulation of spine  
818 structural plasticity by Arc/Arg3.1. *Seminars in Cell and Developmental Biology* **77**, 25–32.
- 819 Nielsen L. D., Pedersen C. P., Erlendsson S., Teilum K. (2019) The capsid domain of Arc changes  
820 its oligomerization propensity through direct interaction with the NMDA receptor. *Structure*  
821 **27**, 1071–1081.
- 822 Nikolaienko O., Eriksen M. S., Patil S., Bito H., Bramham C. R. (2017) Stimulus-evoked ERK-  
823 dependent phosphorylation of activity-regulated cytoskeleton-associated protein (Arc)  
824 regulates its neuronal subcellular localization. *Neuroscience* **360**, 68–80.
- 825 Okuno H., Akashi K., Ishii Y., Yagishita-Kyo N., Suzuki K., Nonaka M., Kawashima T., et al.  
826 (2012) Inverse synaptic tagging of inactive synapses via dynamic interaction of Arc/Arg3.1  
827 with CaMKII $\beta$ . *Cell* **149**, 886–898.

- 828 Palacios-Moreno J., Foltz L., Guo A., Stokes M. P., Kuehn E. D., George L., Comb M., Grimes  
829 M. L. (2015) Neuroblastoma tyrosine kinase signaling networks involve FYN and LYN in  
830 endosomes and lipid rafts. *PLoS Computational Biology* **11**, e1004130.
- 831 Pastuzyn E. D., Day C. E., Kearns R. B., Kyrke-Smith M., Taibi A. v., McCormick J., Yoder N.,  
832 et al. (2018) The neuronal gene Arc encodes a repurposed retrotransposon Gag protein that  
833 mediates intercellular RNA transfer. *Cell* **173**, 275–288.
- 834 Peebles C. L., Yoo J., Thwin M. T., Palop J. J., Noebels J. L., Finkbeiner S. (2010) Arc regulates  
835 spine morphology and maintains network stability in vivo. *Proceedings of the National  
836 Academy of Sciences of the United States of America* **107**, 18173–18178.
- 837 Peng J., Kim M. J., Cheng D., Duong D. M., Gygi S. P., Sheng M. (2004) Semiquantitative  
838 proteomic analysis of rat forebrain postsynaptic density fractions by mass spectrometry.  
839 *Journal of Biological Chemistry* **279**, 21003–21011.
- 840 Plath N., Ohana O., Schmitz D., Gross C., Mao X., Engelsberg A., Mahlke C., et al. (2006)  
841 Arc/Arg3.1 is essential for the consolidation of synaptic plasticity and memories. *Neuron* **52**,  
842 437–444.
- 843 Read J., Collie I. T., Nguyen-McCarty M., Lucaj C., Robinson J., Conway L., Mukherjee J., et al.  
844 (2019) Tool inhibitors and assays to interrogate the biology of the TRAF2 and NCK  
845 interacting kinase. *Bioorganic and Medicinal Chemistry Letters* **29**, 1962–1967.
- 846 Rial Verde E. M., Lee-Osbourne J., Worley P. F. F., Malinow R., Cline H. T. T. (2006) Increased  
847 expression of the immediate-early gene Arc/Arg3.1 reduces AMPA receptor-mediated  
848 synaptic transmission. *Neuron* **52**, 461–474.
- 849 Shepherd J. D., Rumbaugh G., Wu J., Chowdhury S., Plath N., Kuhl D., Huganir R. L., Worley P.  
850 F. (2006) Arc/Arg3.1 mediates homeostatic synaptic scaling of AMPA receptors. *Neuron* **52**,  
851 475–484.
- 852 Taira K., Umikawa M., Takei K., Myagmar B. E., Shinzato M., Machida N., Uezato H., Nonaka  
853 S., Kariya K. I. (2004) The Traf2- and Nck-interacting kinase as a putative effector of Rap2  
854 to regulate actin cytoskeleton. *Journal of Biological Chemistry* **279**, 49488–49496.
- 855 Trinidad J. C., Barkan D. T., Gullledge B. F., Thalhammer A., Sali A., Schoepfer R., Burlingame  
856 A. L. (2012) Global identification and characterization of both O-GlcNAcylation and  
857 phosphorylation at the murine synapse. *Molecular and Cellular Proteomics* **11**, 215–229.

- 858 Trinidad J. C., Thalhammer A., Specht C. G., Lynn A. J., Baker P. R., Schoepfer R., Burlingame  
859 A. L. (2008) Quantitative analysis of synaptic phosphorylation and protein expression.  
860 *Molecular and Cellular Proteomics* **7**, 684–696.
- 861 Wang Q., Amato S. P., Rubitski D. M., Hayward M. H., Kormos B. L., Verhoest P. R., Xu L.,  
862 Brandon N. J., Ehlers M. D. (2016) Identification of phosphorylation consensus sequences  
863 and endogenous neuronal substrates of the psychiatric risk kinase TNIK. *Journal of*  
864 *Pharmacology and Experimental Therapeutics* **356**, 410–423.
- 865 Wang Q., Charych E. I., Pulito V. L., Lee J. B., Graziane N. M., Crozier R. A., Revilla-Sanchez  
866 R., et al. (2011) The psychiatric disease risk factors DISC1 and TNIK interact to regulate  
867 synapse composition and function. *Molecular Psychiatry* **16**, 1006–1023.
- 868 Waung M. W., Pfeiffer B. E., Nosyreva E. D., Ronesi J. A., Kimberly M. (2008) Rapid translation  
869 of Arc/Arg3.1 selectively mediates mGluR dependent LTD through persistent increases in  
870 AMPAR endocytosis rate. *Neuron* **59**, 84–97.
- 871 Wee C. L., Teo S., Oey N. E., Vandongen A. M. J., Wright G. D., Hendrika M. A. (2014) Nuclear  
872 Arc interacts with the histone acetyltransferase Tip60 to modify H4K12. *eNeuro* **1**, e0019-  
873 14.2014.
- 874 Yamazaki H., Sasagawa Y., Yamamoto H., Bito H., Shirao T. (2018) CaMKII $\beta$  is localized in  
875 dendritic spines as both drebrin-dependent and drebrin-independent pools. *Journal of*  
876 *Neurochemistry* **146**, 145–159.
- 877 Zhang W., Chuang Y. A., Na Y., Ye Z., Yang L., Lin R., Zhou J., et al. (2019) Arc oligomerization  
878 is regulated by CaMKII phosphorylation of the GAG domain: an essential mechanism for  
879 plasticity and memory formation. *Molecular Cell* **75**, 13–25.
- 880 Zhang W., Wu J., Ward M. D., Yang S., Chuang Y., Li R., Leahy D. J., Worley P. F. (2016)  
881 Structural basis of arc binding to synaptic proteins: implications for cognitive disease. *Neuron*  
882 **86**, 490–500.
- 883

**a**

**Arc  
(mouse)**

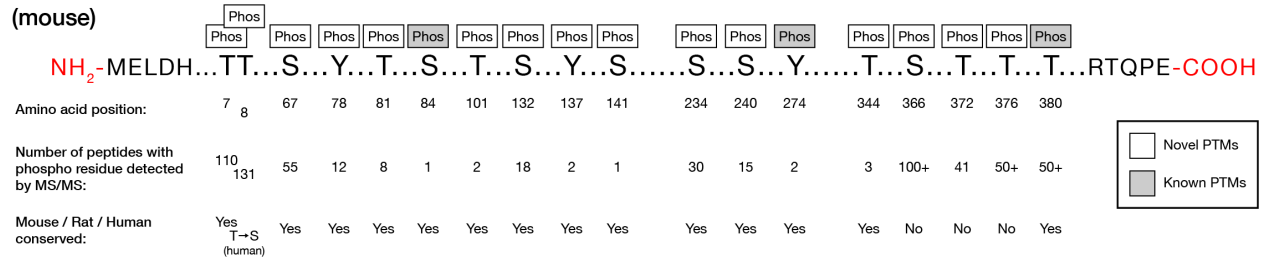

**b**

**TNIK phosphorylation consensus sequence variants:**

**pT/S-L/I/V-D/E-x-x-x-R/K**  
**pT/S-L/I/V-x-R/K**  
**pT/S-L-P/Q-L/I-x-x-R/K**

**c**

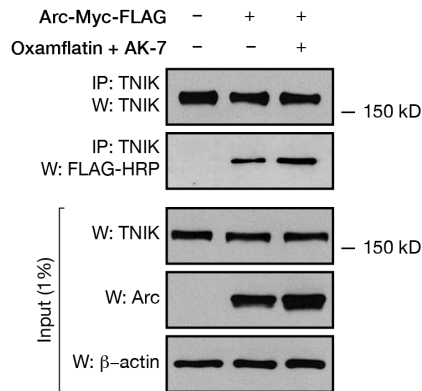

**d**

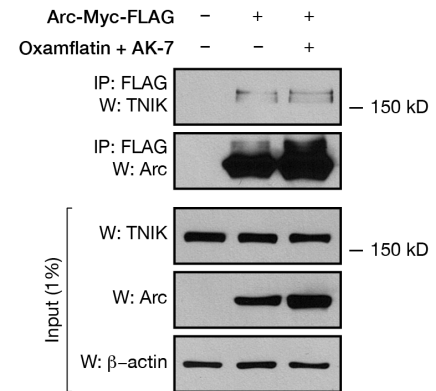

884

885

886 **Figure 1. Mass spectrometry shows novel phosphorylation sites on Arc, revealing the**

887 **interaction between Arc and TNIK.** (a) Arc murine protein sequence displaying phosphorylated

888 residues of Arc-Myc-FLAG immunopurified from overexpressing Neuro2a cells determined by

889 tandem MS/MS, shaded and clear ‘Phos’ boxes represent known and novel phosphorylation events

890 respectively. (b) TNIK phosphorylation consensus sequence variants (Wang *et al.* 2016). Residue

891 that is phosphorylated is pictured in red. (c) TNIK coimmunoprecipitation with Myc-FLAG-Arc.

892 The lysates of Neuro2a cells were immunoprecipitated with the anti-TNIK antibody and were

893 analyzed by immunoblotting using anti-FLAG-HRP antibody. Input control was analyzed using

894 TNIK and Arc,  $\beta$ -actin was used as a loading control. The addition of oxamflatin and AK 7 (16.67

895  $\mu$ M) were employed to increase the abundance of endogenous Arc (Lalonde *et al.*, 2017). (d) Myc-

896 FLAG-Arc coimmunoprecipitation with endogenous TNIK. The lysates of Neuro2a cells were

897 immunoprecipitated with the anti-FLAG antibody and were analyzed by immunoblotting using

898 anti-TNIK and anti-Arc antibodies. Input control was analyzed using TNIK and Arc,  $\beta$ -actin was

899 used as a loading control.

FIGURE 2

WALCZYK-MOORADALLY ET AL.

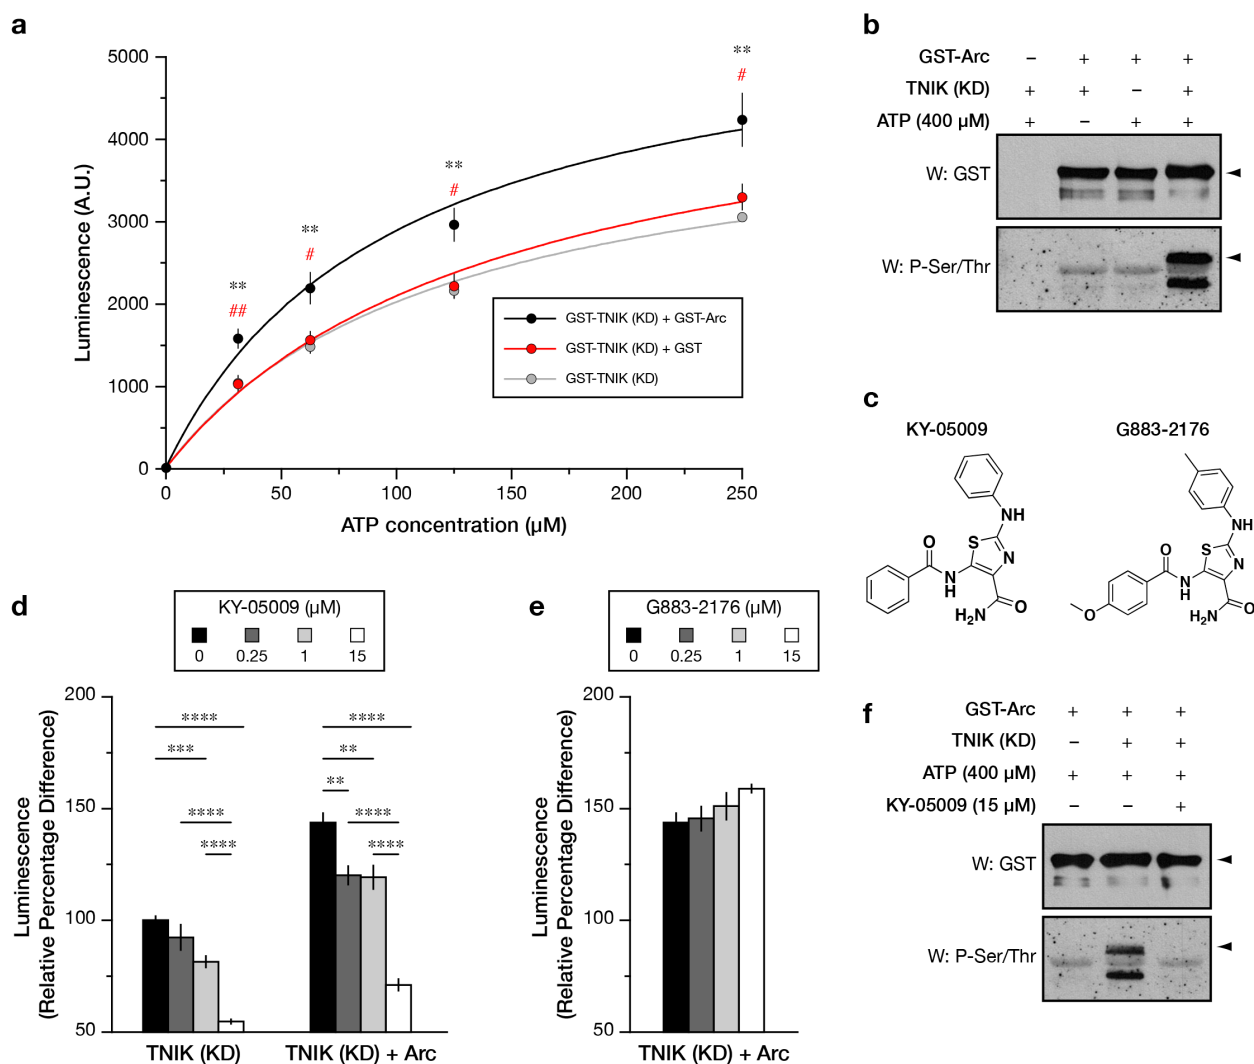

900  
 901 **Figure 2. Arc was shown to be a substrate for TNIK phosphorylation using a kinase assay.**  
 902 (a) Arc is able to significantly increase TNIK activity with increased levels of ATP concentration  
 903 in comparison to GST-TNIK alone, and control GST-TNIK + GST. One-way ANOVA revealed a  
 904 significant dose–response difference between Arc and GST-TNIK (31.25μM,  $F_{2,14} = 10.47$ ,  $p <$   
 905 0.01; 62.5μM,  $F_{2,14} = 8.38$ ,  $p < 0.01$ ; 125 μM,  $F_{2,14} = 8.87$ ,  $p < 0.01$ ; 250 μM,  $F_{2,14} = 9.02$ ,  $p <$   
 906 0.01). Tukey’s HSD post hoc test, \*\*  $p < 0.01$  in comparison to GST-TNIK (represented by the  
 907 grey line), #  $p < 0.05$ ; ##  $p < 0.01$  in comparison to GST-TNIK + GST (represented by the red  
 908 line). (b) Western blots showing the levels of GST to indicate Arc abundance, and phospho-  
 909 serine/threonine to measure overall phosphorylation levels in Neuro2a lysate that was transfected  
 910 with Arc-GST and/or TNIK and ATP (400 μM). (c) Chemical structure of TNIK inhibitor, KY-  
 911 05009 (left); and inactive analog, G883-2176 (right). (d-e) KY-05009 and G883-2176 was applied



912 in increasing concentrations (0, 0.25, 1, and 15  $\mu$ M) to assess the effects on kinetic interaction  
913 between TNIK and Arc. Graphs show luminescence relative percentage difference upon addition  
914 of KY-05009 or G883-2176, respectively ( $\pm$ SEM). One-way ANOVA revealed a significant dose-  
915 dependent response between KY-05009 concentrations for TNIK alone ( $F_{3,25} = 47.92, p < 0.0001$ )  
916 as well as TNIK + GST-Arc ( $F_{3,35} = 37.58, p < 0.0001$ ). Tukey's HSD post hoc test, \*  $p < 0.05$ ;  
917 \*\*  $p < 0.01$ , \*\*\*  $p < 0.005$ ; \*\*\*\*  $p < 0.0001$ . (f) Neuro2a cells were treated with KY-05009 (15  
918  $\mu$ M) and immunoblotted with anti-GST and anti-phospho-serine/threonine to analyze overall  
919 phosphorylation levels.

FIGURE 3

WALCZYK-MOORADALLY ET AL.

**a**

| Arc/Arg3.1 amino acid | Number of peptides with phospho residue detected by MS/MS | Peptide sequence                                 | TNIK phosphorylation consensus sequence |
|-----------------------|-----------------------------------------------------------|--------------------------------------------------|-----------------------------------------|
| S67                   | 2                                                         | HR <b>S</b> *VGKLENNLDGYVPTGDSQR                 | pT/S-L/I/V-x-R/K                        |
| S132                  | 2                                                         | DRLES*MGGKYPVGSEPAR                              | -                                       |
| T278                  | 3                                                         | EFLQYSEG <b>T</b> *LSR                           | pT/S-L/I/V-x-R/K                        |
| S366                  | 11                                                        | EVQDGLQAAEP <b>S</b> *GTPLPTEDETEALTPALTSSEVASDR | -                                       |

**b**

|                        | S67 TNIK consensus |             |                   |    | T278 TNIK consensus |          |           |            |     |
|------------------------|--------------------|-------------|-------------------|----|---------------------|----------|-----------|------------|-----|
| <i>H. sapiens</i>      | RELKGLHR           | <b>SVGK</b> | LESNLDGY          | 78 | 270                 | EFLQYSEG | <b>TL</b> | SREAIQRELD | 289 |
| <i>C. jacchus</i>      | RELKGLHR           | <b>SVGK</b> | LESNLDGY          | 78 | 270                 | EFLQYSEG | <b>TL</b> | SREAIQRELD | 289 |
| <i>R. norvegicus</i>   | RELKGLHR           | <b>SVGK</b> | LENNLDGY          | 78 | 270                 | EFLQYSEG | <b>TL</b> | SREAIQRELD | 289 |
| <i>M. musculus</i>     | RELKGLHR           | <b>SVGK</b> | LENNLDGY          | 78 | 270                 | EFLQYSEG | <b>TL</b> | SREAIQRELD | 289 |
| <i>G. gallus</i>       | RELKGLQ <b>K</b>   | <b>SVGK</b> | LENNLE <b>EDH</b> | 77 | 266                 | EFLQYSEG | <b>TL</b> | RDAIKRELD  | 285 |
| <i>A. carolinensis</i> | RELKGLQ <b>K</b>   | <b>SVGK</b> | LENNLE <b>EDH</b> | 78 | 270                 | EFLQYSEG | <b>TL</b> | RDAIKRELD  | 289 |

**c**

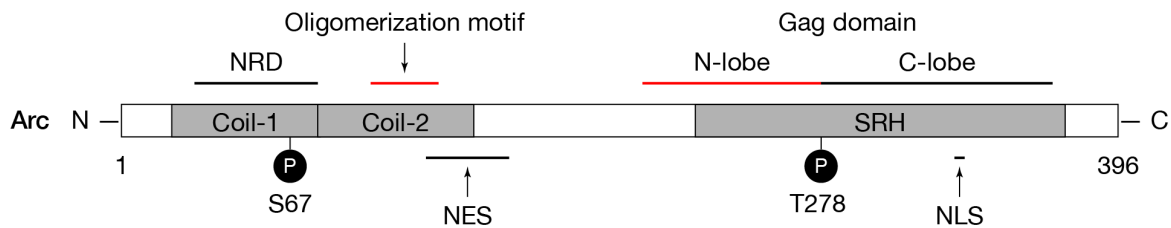

920

921 **Figure 3. TNIK phosphorylates Arc at evolutionarily conserved sites S67 and T278.** (a)

922 Phosphorylated residues detected by MS/MS for recombinant Arc subjected to TNIK kinase assay.

923 The phosphorylated serine (S) and threonine (T) sites in the isolated Arc tryptic peptides are

924 presented in red with adjacent asterisk (\*). (b) Alignment of Arc sequences shows that TNIK

925 consensus sequences (black boxes) for S67 and T278 are conserved amongst a variety of species.

926 Amino acids shaded in grey are different from consensus with other species. (c) Schematic

927 representation of novel phosphorylation sites of interest in relation with key functional domains.

928 NRD, nuclear retention domain (residues 29-78, Korb *et al.*, 2013); NES, nuclear export signal

929 (residues 121-154, Korb *et al.*, 2013); NLS, Pat7 nuclear localization signal (residues 331-335,

930 Korb *et al.*, 2013); Coiled-coil domain (Coil-1 residues 20-77, Coil-2 residues 78-140, Eriksen *et*

931 *al.*, 2020); Arc oligomerization motif (residues 99-126, Eriksen *et al.*, 2020); SRH, spectrin-repeat

932 homology domain (residues 228-375); Arc Gag domain (N-lobe residues 207-277, C-lobe residues

933 278-370, Zhang *et al.* 2015).

FIGURE 4

WALCZYK-MOORADALLY ET AL.

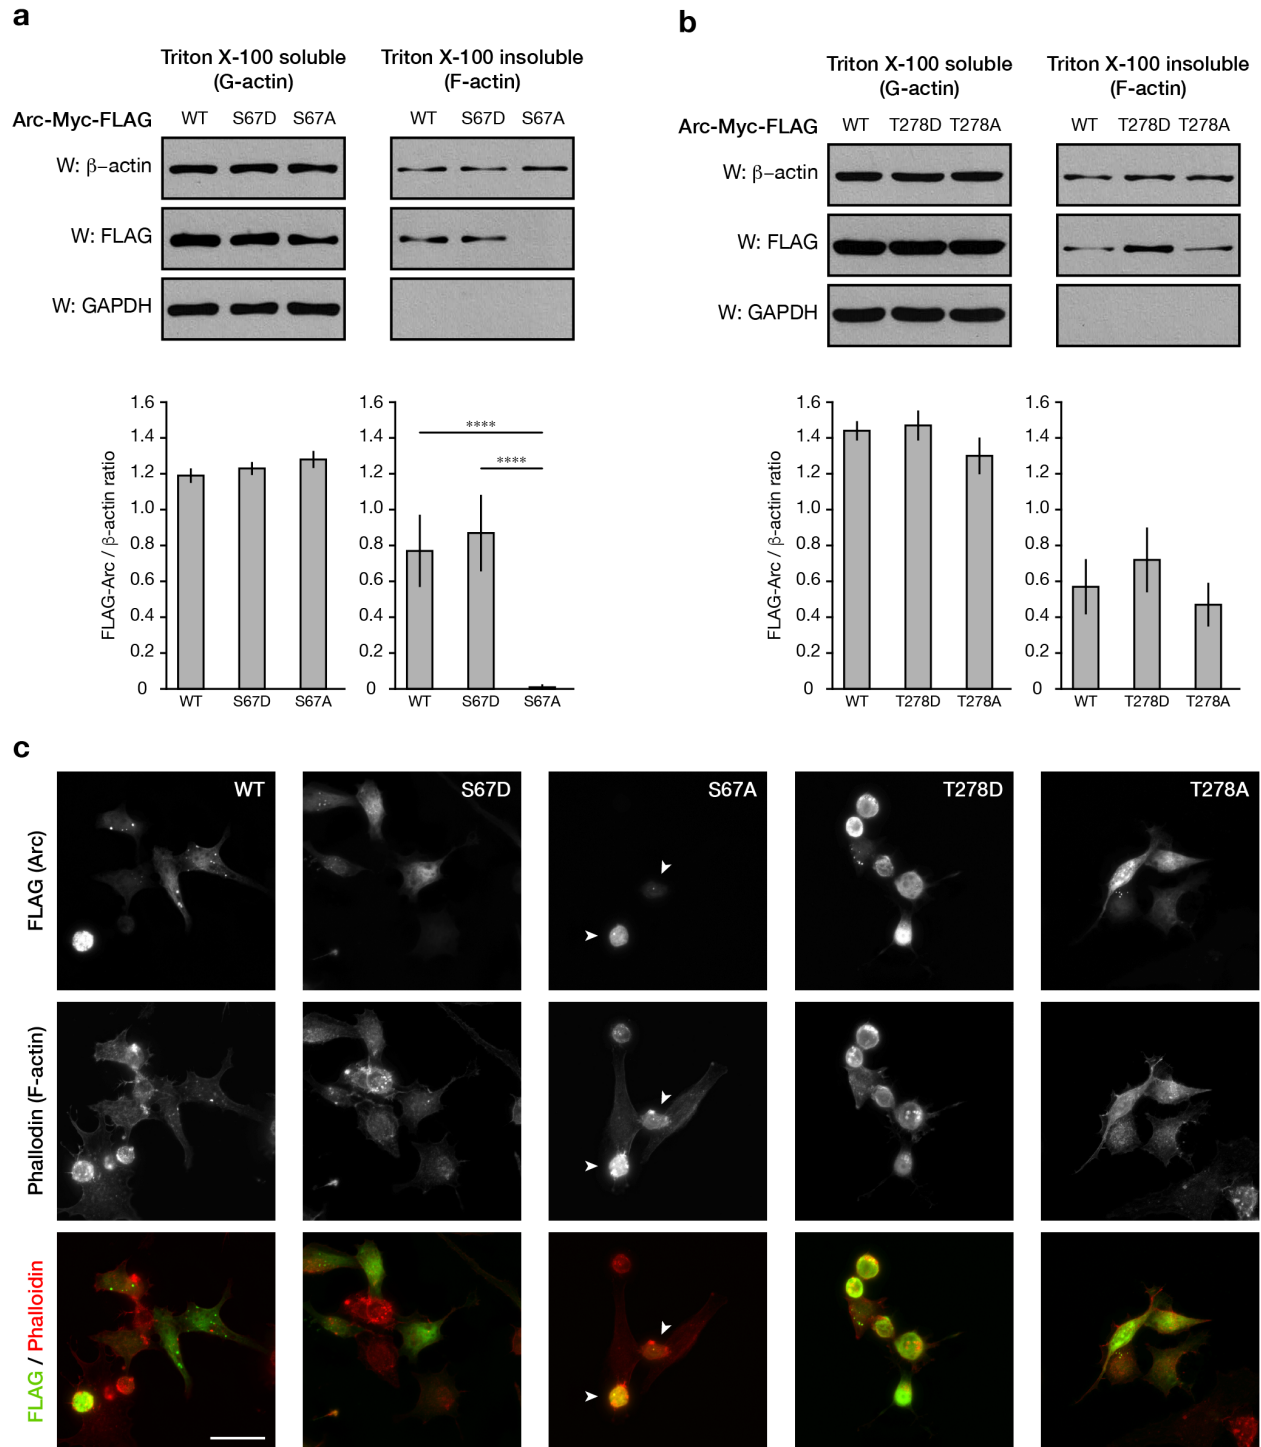

934

935

936 **Figure 4. S67 influences Arc subcellular distribution.** (a-b) Actin co-sedimentation assay  
 937 revealed absence of unmodifiable Arc-Myc-FLAG S67A from F-actin fraction. WT, S67D  
 938 phosphomimic, and both T278 variants (phosphomimic and unmodifiable) co-sedimented

939 similarly with F-actin. Western blots show levels of  $\beta$ -actin, FLAG-tagged Arc, and GAPDH in  
940 Neuro2a cells that were transfected with Arc constructs and subjected to actin co-sedimentation  
941 assay. GAPDH was probed as a control and graphs show mean ( $\pm$ SEM) of FLAG/ $\beta$ -actin ratio for  
942 each condition. One-way ANOVA revealed a significant difference in distribution of Arc with F-  
943 actin for S67A with WT and S67D ( $F_{2,11} = 32.87, p < 0.0001$ ). Tukey's HSD post hoc test, \*\*\*\*  $p$   
944  $< 0.0001$ . (c) Neuro2a cells were transfected with constructs to express Arc-Myc-FLAG (WT or  
945 the different point-mutants). Representative images of cells fixed, immunostained with an antibody  
946 recognizing FLAG to detect exogenously expressed Arc (top row) and incubated with Alexa Fluor  
947 594-conjugated phalloidin to reveal F-actin distribution (middle row) The merged microscopy  
948 captures (FLAG green fluorophore, phalloidin red fluorophore) are presented in the bottom row.  
949 Arc-Myc-FLAG S67A (arrowheads), but not the other tested variants, appeared to be only found  
950 the nuclei of transfected cells. Scale bar 250  $\mu$ m.

FIGURE 5

WALCZYK-MOORADALLY ET AL.

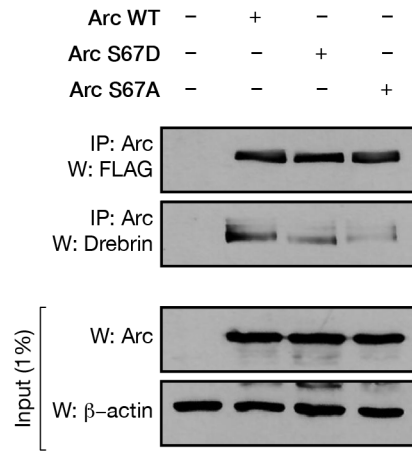

951

952

953 **Figure 5. Modification of S67 influences interaction with F-actin binding protein Drebrin.**

954 Myc-FLAG-Arc coimmunoprecipitation with endogenous drebrin. The lysates of Neuro2a cells  
955 were immunoprecipitated with the anti-FLAG antibody and were analyzed by immunoblotting  
956 using anti-Arc and anti-drebrin antibodies. Input samples were analyzed using drebrin and Arc  
957 antibodies, and  $\beta$ -actin was used as a loading control.

958

FIGURE 6

WALCZYK-MOORADALLY ET AL.

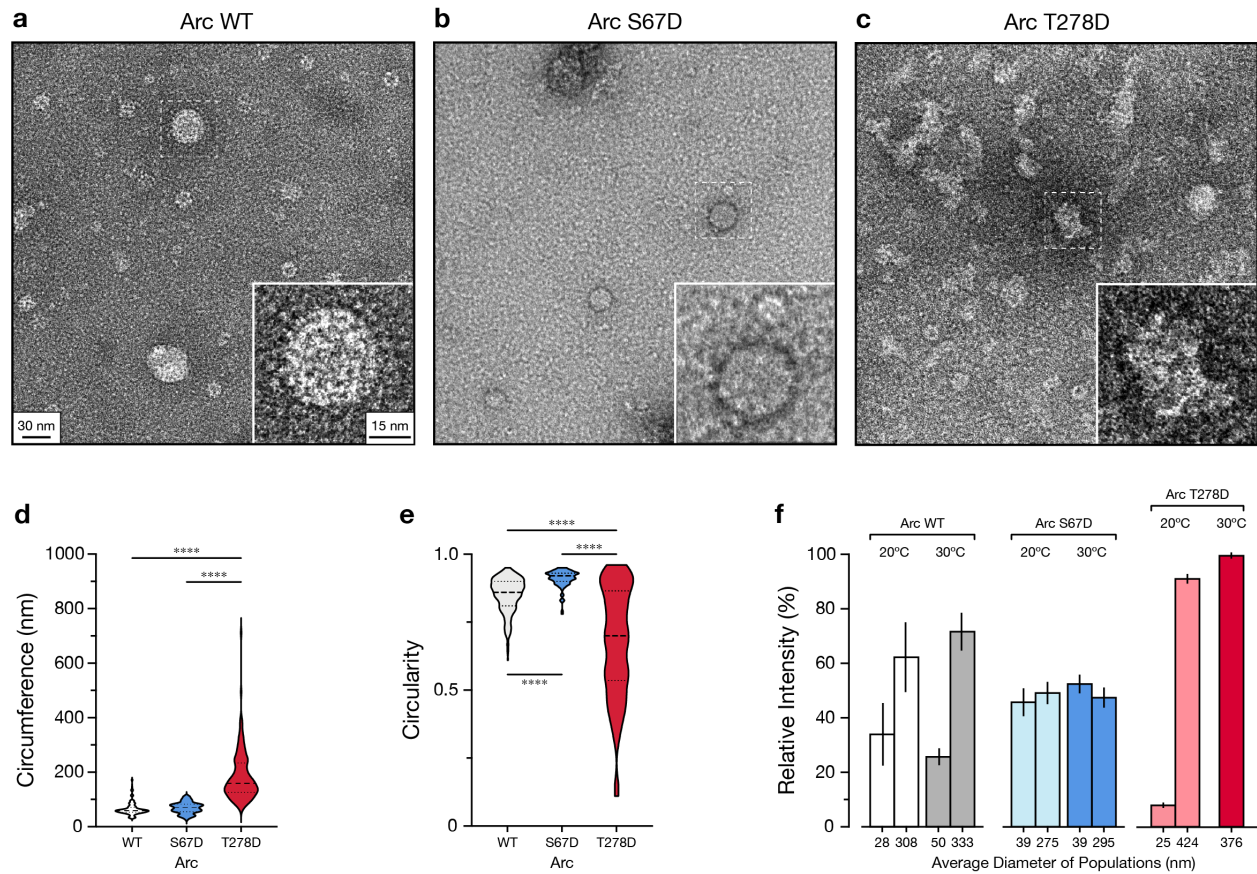

959  
960

961 **Figure 6. T278 plays a role in capsid dynamics.** (a-c) Negative stain EM images (48,000X  
962 magnification) of capsid formations prepared with WT (a), S67D (b), and T278D recombinant  
963 Arc. (d-e) Violin plots comparing circumference (d) and capsid circularity (e) for each Arc variant.  
964 The dashed line represents the median while the dotted lines represent the two quartile lines. One-  
965 way ANOVAs revealed significant main effects (circumference,  $F_{2, 535} = 294.36$ ,  $p < 0.0001$ ;  
966 circularity,  $F_{2, 535} = 150.8$ ,  $p < 0.0001$ ). Tukey's HSD post hoc test, \*\*\*  $p < 0.005$ ; \*\*\*\*  $p < 0.0001$ .  
967 (f) DLS-derived weighted size distribution for each Arc variant at two temperatures (20°C and  
968 30°C) represented as bar graph with x-axis indicating average diameter of measured subpopulations  
969 and error bars representing SEM.

FIGURE 7

WALCZYK-MOORADALLY ET AL.

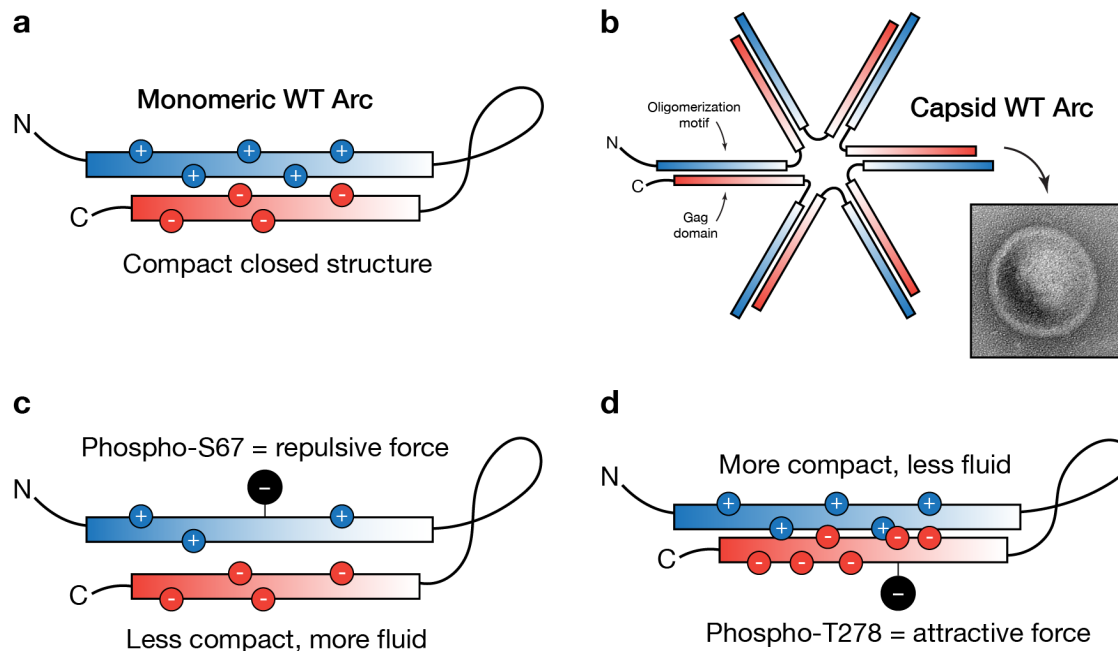

970

971

972

973 **Figure 7. Arc monomeric and oligomeric organization.** (a) Monomeric Arc form a compact

974 closed structure where N-terminal oligomerization motif binds to C-terminus Gag domain. (b) Arc

975 monomers can form virus-like capsids (EM image capture shown) by establishing domain

976 swapping interactions between the N-terminal of one unit and the C-terminus of another. (c-d)

977 Predicted influence of S67 (c) and T278 (d) phosphorylation on the contact affinity of an Arc

978 monomer.

979

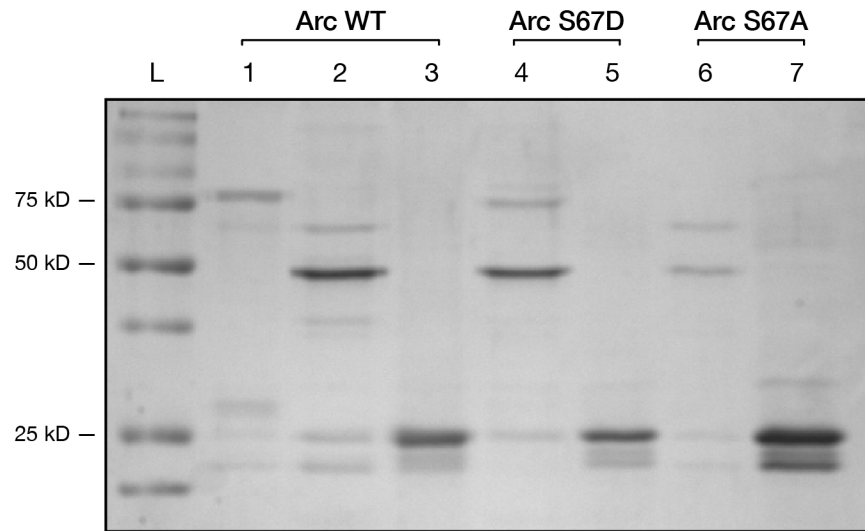

980

981

982 **Figure S1. Coomassie gel showing purification of cleaved Arc variants.** Lane 1) uncleaved WT  
983 Arc-GST loaded onto SEC; 2) cleaved WT Arc concentrated fractions; 3) cleaved GST from WT  
984 Arc; 4) cleaved S67D Arc concentrated fractions; 5) cleaved GST from S67D Arc; 6) cleaved  
985 T278D Arc concentrated fractions; 7) cleaved GST from T278D Arc.



986

| Residue | Number of peptides detected per MS/MS |       | Peptide sequence (UniProt: Q9WV31)                 | Mouse / Rat / Human conserved | Previously identified                  |
|---------|---------------------------------------|-------|----------------------------------------------------|-------------------------------|----------------------------------------|
|         | Run 1                                 | Run 2 |                                                    |                               |                                        |
| T7      | 19                                    | 91    | ELDHMT* <b>T</b> GGLHAYPAPR                        | Yes                           | -                                      |
| T8      | 26                                    | 95    | ELDHMT* <b>T</b> GGLHAYPAPR                        | No                            | -                                      |
| S67     | 3                                     | 52    | ELKGLHRS* <b>S</b> VGKLENNLDGYVPTGDSQR             | Yes                           | -                                      |
| Y78     | 1                                     | 11    | GKLENNLDGY* <b>Y</b> VPTGDSQR                      | Yes                           | -                                      |
| T81     | 1                                     | 7     | GKLENNLDGYVPT* <b>T</b> GDSQR                      | Yes                           | -                                      |
| S84     | -                                     | 1     | GKLENNLDGYVPTGDS* <b>S</b> QR                      | Yes                           | PhosphoSitePlus® (www.phosphosite.org) |
| T101    | 1                                     | 1     | CQET* <b>T</b> IANLER                              | Yes                           | -                                      |
| S132    | 3                                     | 15    | WADRLES* <b>S</b> MGGKYPVGSEPAR                    | Yes                           | -                                      |
| K136    | 1                                     | 3     | WADRLESMGG* <b>K</b> YPVGSEPAR                     | Yes                           | -                                      |
| Y137    | 2                                     | -     | WADRLESMGG* <b>Y</b> YPVGSEPAR                     | Yes                           | -                                      |
| S141    | 1                                     | -     | WADRLESMGGKYPVGS* <b>S</b> EPAR                    | Yes                           | -                                      |
| S234    | 1                                     | 29    | VGGS* <b>S</b> EEYWLSQIQNHMNGPAK                   | Yes                           | -                                      |
| S240    | -                                     | 15    | VGGSEYWLS* <b>S</b> QIQNHMNGPAK                    | Yes                           | -                                      |
| Y274    | -                                     | 2     | EFLQ* <b>Y</b> SEGTLR                              | Yes                           | Palacios-Moreno <i>et al.</i> (2015)   |
| K293    | 1                                     | -     | ELELPQ* <b>K</b> QGEPLDQFLWR                       | Yes                           | -                                      |
| T344    | 1                                     | 2     | HPLPK* <b>T</b> LEQLIQR                            | Yes                           | -                                      |
| S366    | 46                                    | 40+   | EVQDGLAQAAEPS* <b>S</b> GTPLPTED ETEALTPALTSESASDR | No                            | -                                      |
| T372    | 4                                     | 37    | EVQDGLAQAAEPSGTPL* <b>T</b> ED ETEALTPALTSESASDR   | No                            | -                                      |
| T376    | 14                                    | 40+   | EVQDGLAQAAEPSGTPLPTED * <b>T</b> EALTPALTSESASDR   | No                            | -                                      |
| T380    | 2                                     | 40+   | EVQDGLAQAAEPSGTPLPTED ETEAL* <b>T</b> PALTSESASDR  | Yes                           | Gozdz <i>et al.</i> (2017)             |

987

988 **Supplementary Table 1. Phosphorylation peptide information pertaining to results obtained**  
 989 **from MS/MS from Neuro2a cells overexpressing WT Arc-Myc-FLAG.** The phosphorylated  
 990 serine (S) / threonine (T) / tyrosine (Y) residues of the isolated Arc tryptic peptides are presented  
 991 in red with asterisk (\*). The total number of peptides detected with a phosphorylation modification  
 992 is presented separately for each independent biological replicate.
